1 **Quantifying differences between passive and task-evoked intrinsic functional connectivity in**  
2 **a large-scale brain simulation**

3

4 Antonio Ulloa<sup>1,2\*</sup> and Barry Horwitz<sup>1</sup>

5

6 <sup>1</sup>Brain Imaging and Modeling Section, National Institute on Deafness and Other Communication  
7 Disorders, National Institutes of Health, Bethesda, MD, USA

8 <sup>2</sup>Neural Bytes, Washington, DC, USA

9 \*Corresponding author

10 Email: [antonio.ulloa@alum.bu.edu](mailto:antonio.ulloa@alum.bu.edu)

11

12  
13  
14  
15  
16  
17  
18  
19  
20  
21  
22  
23  
24  
25  
26  
27  
28  
29  
30  
31  
32  
33

## Abstract

Establishing a connection between intrinsic and task-evoked brain activity is critical because it would provide a way to map task-related brain regions in patients unable to comply with such tasks. A crucial question within this realm is to what extent the execution of a cognitive task affects the intrinsic activity of brain regions not involved in the task. Computational models can be useful to answer this question because they allow us to distinguish task from non-task neural elements while giving us the effects of task execution on non-task regions of interest at the neuroimaging level. The quantification of those effects in a computational model would represent a step towards elucidating the intrinsic versus task-evoked connection. Here we used computational modeling and graph theoretical metrics to quantify changes in intrinsic functional brain connectivity due to task execution. We used our Large-Scale Neural Modeling framework to embed a computational model of visual short-term memory into an empirically derived connectome. We simulated a neuroimaging study consisting of ten subjects performing passive fixation (PF), passive viewing (PV) and delay match-to-sample (DMS) tasks. We used the simulated BOLD fMRI time-series to calculate functional connectivity (FC) matrices and used those matrices to compute several graph theoretical measures. After determining that the simulated graph theoretical measures were largely consistent with experiments, we were able to quantify the differences between the graph metrics of the PF condition and those of the PV and DMS conditions. Thus, we show that we can use graph theoretical methods applied to simulated brain networks to aid in the quantification of changes in intrinsic brain functional connectivity during task execution. Our results represent a step towards establishing a connection between intrinsic and task-related brain activity.

## Author Summary

34  
35  
36 Studies of resting-state conditions are popular in neuroimaging. Participants in resting-state  
37 studies are instructed to fixate on a neutral image or to close their eyes. This type of study has  
38 advantages over traditional task-based studies, including its ability to allow participation of  
39 those with difficulties performing tasks. Further, a resting-state neuroimaging study reveals  
40 intrinsic activity of participants' brains. However, task-related brain activity may change this  
41 intrinsic activity, much as a stone thrown in a lake causes ripples on the water's surface. Can we  
42 measure those activity changes? To answer that question, we merged a computational model  
43 of visual short-term memory (task regions) with an anatomical model incorporating major  
44 connections between brain regions (non-task regions). In a computational model, unlike real  
45 data, we know how different regions are connected and which regions are doing the task. First,  
46 we simulated neuronal and neuroimaging activity of both task and non-task regions during  
47 three conditions: passive fixation (baseline), passive viewing, and visual short-term memory.  
48 Then, applying graph theory to the simulated neuroimaging of non-task regions, we computed  
49 differences between the baseline and the other conditions. Our results show that we can  
50 measure changes in non-task regions due to brain activity changes in task-related regions.

51

## 52 INTRODUCTION

53 Recently, there has been significant interest in investigating the relationship between intrinsic  
54 and task-evoked brain activity. This interest is driven by the potential to discover information  
55 contained in intrinsic brain activity that would reveal the repertoire of functional brain  
56 networks used to execute goal-directed tasks ([Cole, Bassett, Power, Braver, & Petersen, 2014](#)).  
57 Intrinsic and task-evoked activity are strongly interdependent ([Bolt, Anderson, & Uddin, 2017](#))  
58 and understanding this interdependence holds the promise of providing a link between resting  
59 state and task-based empirical findings ([Cole et al., 2014](#)). Furthermore, the establishment of a  
60 clear relationship between intrinsic and task brain activity would allow the assessment of task-  
61 related brain areas in patients unable to comply with such tasks ([Branco et al., 2016](#); [H. Liu et](#)  
62 [al., 2009](#))

63  
64 Neuroimaging studies have shown that performance of a cognitive task alters the intrinsic  
65 functional connectivity in non-task related brain regions ([Bluhm et al., 2011](#); [Tommasin et al.,](#)  
66 [2017](#); [Vatansever, Menon, Manktelow, Sahakian, & Stamatakis, 2015](#)). Bluhm and colleagues,  
67 for example, found increases in functional connectivity between two “default network” brain  
68 regions (posterior cingulate / precuneus and medial prefrontal cortex) and the rest of the brain  
69 during a visual working memory task as compared to a passive fixation task. In another study,  
70 Tommasin and colleagues found reductions in functional connectivity between brain regions  
71 within the “default mode network” (DMN) during an auditory working memory task as  
72 compared to an eyes-open resting state (RS) task. Similarly, Vatansever and colleagues found

73 reductions in functional connectivity within DMN brain regions during a motor task as  
74 compared to a RS task.

75  
76 A very powerful tool that has been used to quantify changes in intrinsic functional connectivity  
77 due to task execution employs graph theoretical methods ([Adams, Shipp, & Friston, 2013](#); [Bolt,](#)  
78 [Nomi, Rubinov, & Uddin, 2017](#); [Cohen & D'Esposito, 2016](#); [Fuertinger, Horwitz, & Simonyan,](#)  
79 [2015](#); [Krienen, Yeo, & Buckner, 2014](#); [Moussa et al., 2011](#)). Graph theoretical metrics have been  
80 used in the last decade to study functional and structural brain networks as they provide ways  
81 to quantify both global network organization and local network properties ([Bolt, Nomi, et al.,](#)  
82 [2017](#); [Rubinov & Sporns, 2010](#)).

83  
84 A recent computational study ([Lee, Bullmore, & Frangou, 2017](#)) demonstrated the reliability of  
85 graph theoretical metrics obtained from simulated intrinsic brain activity. Lee and colleagues  
86 modeled brain regions as Kuramoto oscillators coupled by weights extracted from a structural  
87 connectome ([Hagmann et al., 2008](#)). After finding an optimal functional connectivity matrix  
88 (one that resembled the RS empirical connectivity matrix), they set out to compute global and  
89 local network metrics and compared them to empirically-obtained graph metrics during the  
90 resting state. They found that simulated brain activity can be reasonably used to model graph  
91 theoretical metrics of brain organization.

92  
93 However, there is a need to test the use of graph theoretical metrics on simulated intrinsic  
94 activity during task execution. We aimed to use computational modeling and graph theoretical

95 metrics to quantify differences in intrinsic functional brain connectivity of non-task-related  
96 brain regions due to increasing task demands. We used a large-scale computational model of  
97 visual processing that was previously verified against single-unit recordings in non-human  
98 primates and empirical PET, fMRI, and MEG data ([Banerjee, Pillai, & Horwitz, 2012](#); [Corbitt,  
99 Ulloa, & Horwitz, 2018](#); [Horwitz et al., 2005](#); [Q. Liu, Ulloa, & Horwitz, 2017](#); [Tagamets &  
100 Horwitz, 1998](#); [Ulloa & Horwitz, 2016](#)). We embedded the visual processing model in a  
101 structural connectome ([Hagmann et al., 2008](#)) to examine differences in intrinsic neural activity  
102 between three conditions: passive fixation (PF), passive viewing (PV), and a visual delayed  
103 match-to-sample (DMS) task. Specifically, we set out to investigate whether computational  
104 modeling and graph theoretical metrics could be used to quantify and understand intrinsic  
105 neural activity changes in non-task brain regions due to increasing task demands.

106

## 107 **RESULTS**

108 To perform the current study, we embedded a biologically realistic model of visual short-term  
109 memory ([Tagamets & Horwitz, 1998](#)), shown in Figure 1, into an anatomical skeleton defined by  
110 a 998-node structural connectome ([Hagmann et al., 2008](#)), shown in Figure 2, using a blend of  
111 our large-scale neural model (LSNM) simulator ([Ulloa & Horwitz, 2016](#)) and the Virtual Brain  
112 (TVB) simulator ([Sanz Leon et al., 2013](#)). The visual short-term memory model used here has  
113 been previously verified against single-unit recordings in non-human primates ([Tagamets &  
114 Horwitz, 1998](#)) and empirical PET ([Tagamets & Horwitz, 1998](#)), MEG ([Banerjee et al., 2012](#)) and  
115 fMRI data ([Corbitt et al., 2018](#); [Horwitz et al., 2005](#); [Q. Liu et al., 2017](#)). Such a visual model  
116 comprises brain regions that are directly involved in performing a delayed match-to-sample

117 (DMS) task for visual objects. As mentioned above, we added a structural connectome to  
118 provide neural noise to the simulated neural activity during the DMS task, and in return, to  
119 receive inputs back from the DMS task nodes. We have described our framework in a previous  
120 paper ([Ulloa & Horwitz, 2016](#)) where we focused on the fMRI BOLD signal generation during the  
121 DMS task. In the current work, we sought to analyze the functional connectivity (FC)  
122 configurations in brain regions not driving task execution. These ‘non-task’ brain regions exhibit  
123 intrinsic activity and because of their reciprocal connections with task-specific brain regions,  
124 their neural activity can potentially be modulated during task execution.

125  
126 We generated ten virtual subjects by randomly varying the connection weights among brain  
127 regions in the structural visual model (see Methods section for details). We created three  
128 experimental conditions: passive fixation (PF), during which simulated subjects with a low “task  
129 signal” (roughly equivalent to subjects’ attention level during task execution, but see Methods  
130 for definition of this parameter) are fixating on a small dot; passive viewing (PV), during which  
131 subjects passively look at visual shapes; and a DMS task, during which subjects compared two  
132 shapes presented within 1.5 seconds of each other and responded whether the second shape  
133 matched the memory of the first. Each simulated subject performed one 198-second  
134 experiment that consisted of 3-trial blocks interspersed with rest blocks (see Methods section  
135 for details).

136

137 **Changes in simulated BOLD activity of non-task brain regions due to different task conditions.**

138 Figure 3 shows typical (averaged across neuronal populations within each brain region)  
139 neuronal activity for each condition for task-related brain regions during one trial. Figure 3  
140 shows the task regions increasing activity due to both stimuli presentation (V1, V4, IT, PF),  
141 short-term memory maintenance (D1, D2), and response (FR). This increase occurs in the PV  
142 and DMS conditions (green and red lines) but not in the PF condition (blue line). Thus, the  
143 stimulus used in the PF condition (a small dot) does not generate visible changes in the  
144 neuronal activity of task regions. The details of the task-related responses shown in Figure 3  
145 have been discussed in detail in previous papers ([Horwitz et al., 2005](#); [Ulloa & Horwitz, 2016](#)).  
146 Figure 4 shows the BOLD signal averaged across those brain regions with direct anatomical  
147 connections to task regions. Figure 2 shows a graphical depiction of the non-task nodes that are  
148 directly connected to task nodes. Notice how BOLD activity increases during the task blocks  
149 (shaded areas) and how they do so more prominently during DMS than during PV and during PV  
150 than during PF. Also notice how that BOLD activity change is larger for some of the brain  
151 regions with direct connections to IT, FS, D1, D2, FR than those regions with direct connections  
152 to V1 and V4. This is due to variations in the strength of the connecting weights from task-  
153 related nodes to non-task nodes. As we can see in Figure 4, changes in all task-related brain  
154 regions correlate with BOLD signal changes in non-task brain regions directly connected to  
155 them.

156

### 157 **Intrinsic FC differences between PF, PV and DMS conditions.**

158 We computed FC matrices for the three simulated conditions and for all subjects. Figure 5  
159 shows across-subject averages of FC matrices for the three conditions. Figure 6 shows scatter



160 plots between PF and PV and between PF and DMS conditions. As shown in Figure 6, the  
161 correlation coefficients between PF and both PV and DMS were high (0.90 and 0.83,  
162 respectively), demonstrating only small differences in the pair-wise consistency of functional  
163 connections across conditions. As noted above, these correlation matrices consist only of  
164 connectome nodes (e.g., no LSNM task-based nodes were used to construct these matrices). In  
165 summary, there were small changes in the pair-wise functional connectivity between PF and PV  
166 and between PF and DMS conditions.

167

#### 168 **Graph theoretical metrics of PF, PV, and DMS conditions.**

169 Using graph theoretical methods ([Rubinov & Sporns, 2010](#)), we computed eight network  
170 metrics (see Methods section for definition of each metric): global and local efficiencies,  
171 average clustering coefficient, characteristic path length, eigenvector centrality, betweenness  
172 centrality, participation coefficient, and modularity. We calculated these metrics using  
173 weighted FC matrices for a range of plausible threshold densities ([Di, Gohel, Kim, & Biswal,](#)  
174 [2013](#)). Figure 7 shows across-subject averages of those metrics for a range of network densities  
175 ([Di et al., 2013](#)). Figure 7 shows that as the task changed from PF to PV to DMS, there was an  
176 increase in global efficiency, local efficiency, average clustering coefficient and average  
177 betweenness centrality (mostly at the lowest threshold studied, 5%), and modularity.  
178 Conversely, as the task changed from PF to PV to DMS, there was a decrease in average  
179 characteristic path length, average eigenvector centrality, and average participation coefficient.

180

#### 181 **Differences in graph metrics between PF and PV and between PF and DMS.**

182 For each graph metric obtained, we computed the relative difference (see Methods section for  
183 details) between PF and PV and between PF and DMS (see Figure 8). We observed significant  
184 differences between PF and PV and between PF and DMS in modularity ( $54.2 \pm 8\%$  and  $81.3 \pm$   
185  $11.6\%$ , respectively), eigenvector centrality ( $16.3 \pm 1.7\%$  and  $22.1 \pm 1.8\%$ , respectively) and  
186 clustering coefficient ( $7.9 \pm 1.3\%$  and  $12.7 \pm 2\%$ ); smaller changes in global efficiency ( $1.7 \pm$   
187  $0.2\%$  and  $2.4 \pm 0.3$ ), local efficiency ( $2.2 \pm 0.3\%$  and  $3.2 \pm 0.4\%$ ), characteristic path length ( $1.7$   
188  $\pm 0.1\%$  and  $2.3 \pm 0.3\%$ ), betweenness centrality ( $1.6 \pm 0.3\%$  and  $2.6 \pm 0.4\%$ ), and participation  
189 coefficient ( $0.2 \pm 0.1\%$  and  $0.4 \pm 0.1\%$ ).

190

#### 191 **Differences in modularity between conditions.**

192 To further visualize the large differences in modularity configurations during the three  
193 simulated conditions, we rendered the binary FC network in each condition as connection space  
194 graphs using Gephi ([Bastian, Heymann, & Jacomy, 2009](#)); [www.gephi.org](http://www.gephi.org)). We used the  
195 algorithm of Blondel et al ([Blondel, Guillaume, Lambiotte, & Lefebvre, 2008](#)) to find the  
196 modularity at a density threshold of 10%. Figure 10 shows connection space graphs displayed  
197 on a radial axis layout (axis have a slight spiral to improve visualization of inter-module  
198 connectivity). Nodes that belong to the same module are represented by the same color and  
199 group together on the same radial axis. The connections between nodes have the color of the  
200 node where those connections originate. We can see a decrease in the number of modules,  
201 from 8 in PF to 6 in PV to 3 in DMS and an increase in modularity (see increase in modularity  
202 graph in Figure 7). The increase in modularity from PF to PV to DMS means that the functional  
203 network rearranges itself into fewer modules with more functional connections between nodes

204 within the same module (compare the very clearly defined modules in DMS versus PF and DMS  
205 versus PV in Figure 10). We emphasize again that these results refer to non-task related nodes.

206

## 207 **DISCUSSION**

208 Using a large-scale computational model of visual short-term memory embedded into an  
209 anatomical connectome, we compared simulated intrinsic brain activity of non-task related  
210 brain regions during three tasks: passive fixation (PF), during which simulated subjects with a  
211 low “task signal” or “attention” level are fixating on visual stimuli (a small dot); passive viewing  
212 (PV), during which subjects passively watch changing visual shapes but take no action; and a  
213 DMS task, during which subjects compared two shapes presented within 1.5 seconds of each  
214 other and responded whether the second shape matched the memory of the first. The PF  
215 condition may be considered equivalent to a resting state condition as a passive fixation task  
216 has been often used in RS fMRI studies. The key difference between the PF and the PV  
217 conditions was that the stimulus during the PF condition was an unchanging small dot whereas  
218 in the PV condition several different and larger stimuli were presented. The key difference  
219 between the PV and the DMS conditions was the level of the “task” or attention signal, which  
220 was set to a low level in the PV condition and to a high level during the DMS condition. As  
221 discussed in the Methods section, the task signal level determines whether an input stimulus is  
222 going to be retained in short-term memory ([Horwitz et al., 2005](#)). Additionally, because of  
223 feedback connections from D1 in prefrontal cortex to IT and V4 (see model diagram in Figure 1),  
224 the task signal level indirectly influences neuronal activity in V1, V4, and IT (compare neuronal  
225 activity in V1, V4, and IT during different conditions in Figure 3).

226

227 To quantify differences between PF, PV and DMS conditions, we used pair-wise temporal  
228 Pearson correlations (FC matrices) and graph theory metrics of fMRI FC matrices. Whereas we  
229 found small differences between the FC matrices of the simulated conditions, these differences  
230 we not particularly impressive. However, we found clear-cut differences in each of the graph  
231 theory metrics: Graded increases from PF to PV to DMS in global efficiency, local efficiency,  
232 clustering coefficient, betweenness centrality and modularity; and graded decreases in the  
233 from PF to PV to DMS in characteristic path length, eigenvector centrality, and average  
234 participation coefficient. Our simulated graph theory results largely agree with empirical  
235 studies, as will be discussed below in detail.

236

237 In our computer simulations, the intrinsic brain activity across different conditions is modulated  
238 by ongoing neural activity in brain regions engaged in each task (task brain regions). This  
239 modulation happens through the strength of the anatomical connections of those brain regions  
240 to the rest of the brain (non-task brain regions, see Figure 2).

241

242 When the brain engages in a behavioral task, the activity in neuronal populations driving the  
243 task has the potential of reverberating throughout the brain, thereby altering the intrinsic  
244 neural activity of neuronal populations not involved in the task. A crucial question is whether  
245 one can quantify those changes in intrinsic functional connectivity. Computational modeling  
246 can be useful in this regard, as it allows us to isolate non-task from task neuronal populations  
247 and to convert simulated synaptic activity into neuroimaging time-series which in turn can be

248 converted to FC matrices. Furthermore, unlike empirical data, in a computational model we  
249 know which neuronal populations participate in the task and which ones do not.

250

251 A commonly used method to simulate the resting state is by modeling local neuronal  
252 populations with oscillators and using the structural connections obtained from diffusion  
253 tractography as connection weights between the model neuronal populations. A parameter  
254 search is then conducted to find a global coupling parameter and a white matter conduction  
255 speed producing a simulated FC matrix that best matches an empirical FC matrix ([Cabral,](#)  
256 [Hugues, Sporns, & Deco, 2011](#); [Ghosh, Rho, McIntosh, Kotter, & Jirsa, 2008](#); [Gilson, Moreno-](#)  
257 [Bote, Ponce-Alvarez, Ritter, & Deco, 2016](#); [Hansen, Battaglia, Spiegler, Deco, & Jirsa, 2015](#);  
258 [Honey et al., 2009](#); [Lee et al., 2017](#); [Roy et al., 2014](#); [Sanz-Leon, Knock, Spiegler, & Jirsa, 2015](#)).

259 This is the method we used to generate intrinsic activity in the “rest of the brain” of our  
260 simulations.

261

### 262 **Consistency of pair-wise functional connectivity across task conditions**

263 There was a high correlation between the pairs in the FC connectivity matrices between PF and  
264 PV and between PF and DMS (Figure 6). Several researchers have used pair-wise spatial  
265 correlations between functional connectivity (FC) matrices to compare intrinsic to task-evoked  
266 conditions ([Bolt, Nomi, et al., 2017](#); [Buckner et al., 2009](#); [Cohen & D'Esposito, 2016](#); [Cole et al.,](#)  
267 [2014](#); [Di et al., 2013](#); [Krienen et al., 2014](#); [Smith et al., 2009](#)). Generally, there is a relatively high  
268 spatial correlation (i.e., 0.64 – 0.9) between a passive condition (such as visual fixation or eyes  
269 closed, which are often used to study intrinsic brain activity) and a task condition. Despite such

270 high correlations, differences do exist between passive and task FC, and those differences may  
271 be attributable to functional modifications that allow the brain to focus on performing a given  
272 task ([DeSalvo, Douw, Takaya, Liu, & Stufflebeam, 2014](#); [Di et al., 2013](#); [Tomasi, Wang, Wang, &](#)  
273 [Volkow, 2014](#)).

274  
275 Bolt and colleagues ([Bolt, Nomi, et al., 2017](#)) recently showed that one can have largely  
276 consistent FC between passive and task conditions, and at the same time have largely different  
277 whole-brain graph theoretical metrics between passive and task conditions. However, a  
278 description of the mechanisms behind those seemingly divergent results has not yet been  
279 provided.

280

### 281 **Increases in Global Efficiency**

282 Our study resulted in higher global efficiency for DMS than for PV and for PV than for PF. During  
283 the simulated PF condition, the stimuli used is small and mostly activates V1/V2 and V4 and IT  
284 areas to a small degree (blue lines in Figure 3), During the PV condition, the larger stimuli used  
285 causes an increase of neuronal activity in V1/V2, V4, IT, FS, D1, D2, FR (as shown in the trial  
286 time-series of Figure 3, green lines), thereby contributing to an increase in neuronal activity of  
287 non-task nodes directly connected to task nodes (see green lines in the shaded areas of the  
288 time-series in Figure 4). During the DMS condition, the neuronal activity across the task brain  
289 regions is higher than during the PV condition (red lines in Figure 3). This increase in neuronal  
290 activity of task brain regions contributes to an increase in neuronal activity of several of the  
291 non-task brain regions with direct connections to task regions during PV and DMS conditions as

292 compared to PF condition (see Figure 4). As shown in the FC matrices of Figure 5, there is an  
293 increase in the correlation of several pair-wise connections from PF to PV to DMS. This increase  
294 in functional connectivity contributed to a consistent increase in global efficiency from PF to PV  
295 to DMS (Figure 7).

296

297 Graph theoretical measures in empirical studies have consistently shown higher global  
298 efficiency during task than during passive conditions (although this could depend on the  
299 complexity of the task, but see (Cohen and D'Esposito 2016)). The global efficiency has been  
300 found to be higher during a task than during passive fixation ([Bolt, Nomi, et al., 2017](#); [Cohen &](#)  
301 [D'Esposito, 2016](#)), higher during a task than during an eyes closed condition ([Fuertinger et al.,](#)  
302 [2015](#)), greater during a one-back visual memory task than during passive viewing and an eyes  
303 closed condition ([Wen et al., 2015](#)), and higher for coactivation studies than during RS ([Di et al.,](#)  
304 [2013](#)). In our simulations, the global efficiency is higher during DMS than during PV and PF. This  
305 is due to the short-memory task causing an increase of neural activity in brain regions that are  
306 in turn connected to a widely distributed network in the rest of the brain.

307

### 308 **Increases in Local efficiency**

309 Our simulations showed a greater local efficiency for DMS than for PV and for DMS than for PF.  
310 This is consistent with empirical studies showing an increase in local efficiency with increasing  
311 task demands ([Wen et al., 2015](#)).

312

### 313 **Increases in Clustering Coefficient**

314 Our simulations showed a greater clustering coefficient during DMS than during PV and during  
315 PV than during PF. Previous empirical studies have found a clustering coefficient that is greater  
316 for task than during passive fixation ([Bolt, Nomi, et al., 2017](#)), lower during a blend of activation  
317 studies than during resting state ([Di et al., 2013](#)), and greater during a language task than  
318 during eyes closed ([Fuertinger et al., 2015](#)).

319

### 320 **Increases in characteristic path length**

321 Our simulations showed smaller characteristic path length during DMS than during PV and  
322 during PV than during PF. This is to be expected because as the global efficiency increases, the  
323 characteristic path length decreases.

324

### 325 **Decreases in mean Eigenvector Centrality**

326 Our simulations showed smaller eigenvector centrality during DMS than during PV and during  
327 PV than during PF. The eigenvector centrality metric provides a measure of how well-connected  
328 a given node is considering how well connected that node's neighbors are. Thus, eigenvector  
329 centrality is recursive because a given node's eigenvector centrality depends on the node's  
330 neighbors' eigenvector centrality. To get a more detailed view of the reason behind smaller  
331 mean eigenvector centrality for more complex tasks (Figure 7), we rendered the eigenvector  
332 centrality for each node on axial and sagittal views of the brain (Figure 9A). Figure 9A shows  
333 that as the task complexity increases (from PF to PV to DMS) the eigenvector centrality  
334 increases in a few nodes and decreases in most other nodes. Thus, on average the eigenvector  
335 centrality decreases but the nodal eigenvector centrality in a few nodes increases as the task



336 complexity increases. Note that several of the nodes in which the eigenvector centrality  
337 increases during PF and DMS are the nodes that are directly connected to task nodes (compare  
338 to Figure 2). The reason the increases are concentrated on the right side of the brain is due to  
339 the task nodes, which are embedded in the right side of the brain, having direct connections  
340 mostly to the right side of the brain (see Figure 2). Compare the changes in eigenvector  
341 centrality with the changes in betweenness centrality (Figure 7) which remain almost the same  
342 during PF, PV and DMS (Figure 9B).

343

#### 344 **Increases in Betweenness Centrality**

345 Our simulations show a higher betweenness centrality at the lower density threshold (5%) but  
346 the average betweenness centrality is very similar across all the other density thresholds  
347 (Figure 7). As mentioned above, the betweenness centrality at each individual node (Figure 9B)  
348 remains relatively constant across conditions. Previous empirical studies have shown a  
349 difference in nodal centrality when resting state and task are compared ([Di et al., 2013](#)).

350

#### 351 **Decreases in Participation Coefficient**

352 Our simulations showed greater participation coefficient (in a predefined set of modules) for PF  
353 than for PV and for PV than for DMS (Figure 7). Participation coefficient measures each node  
354 participation in a set of predefined modules. We used the modules defined by Hagmann et al  
355 ([Hagmann et al., 2008](#)). Previous studies have shown a higher participation coefficient  
356 (between-module connectivity) during passive fixation than during a semantic task ([DeSalvo et](#)  
357 [al., 2014](#)).

358

### 359 **Increases in Modularity**

360 Our simulations showed a smaller modularity for PF than for PV and for PF than for DMS. Some  
361 empirical studies have found a greater modularity metric during RS than during a blend of  
362 activation studies ([Di et al., 2013](#)), and a greater modularity during passive fixation than during  
363 an n-back task using visually-presented phonemes ([Cohen & D'Esposito, 2016](#)). However, Cohen  
364 et al ([Cohen & D'Esposito, 2016](#)) found a similar modularity during passive fixation and a finger  
365 tapping task. Other empirical studies have found that that the modularity varies as a function of  
366 performance, but here the evidence is also inconsistent. For example, Stevens et al ([Stevens,  
367 Tappon, Garg, & Fair, 2012](#)) found a positive correlation between RS modularity and visual  
368 working memory capacity and Meunier et al ([Meunier et al., 2014](#)) found a negative correlation  
369 between modularity and memory scores in an odor recognition task. Additionally, Yue et al ([Yue  
370 et al., 2017](#)) have found significant individual variability in modularity during resting state.

371

### 372 **Related computational studies comparing resting state and task-based functional** 373 **connectivity.**

374 Two previous computational approaches have compared the intrinsic brain activity obtained  
375 during resting state versus the one obtained during task; however, none of those models was  
376 specifically concerned with quantifying intrinsic activity differences between different task  
377 conditions (which is the goal of our paper). The first one of those studies, by Ponce-Alvarez and  
378 colleagues ([Ponce-Alvarez, He, Hagmann, & Deco, 2015](#)) simulated RS using a set of mean field  
379 equations (excitatory-inhibitory pairs) interconnected by the anatomical connections of a 66-

380 node connectome. A visual task was approximated by applying external stimulation (stationary  
381 inputs) to visual nodes during the RS simulation. Ponce-Alvarez's model revealed a decreased  
382 synaptic activity variability during the visual task as compared to the RS condition.

383

384 The second computational study comparing task versus rest ([Cole, Ito, Bassett, & Schultz, 2016](#))  
385 similarly applied stationary inputs to a set of neighboring nodes in a simplified computational  
386 model to simulate six different tasks. Cole and colleagues used the FC strengths during a  
387 passive task to predict the fMRI task activation of a held-out brain region. They did this for each  
388 one of the brain areas simulated to produce a prediction of the fMRI activity in each one of the  
389 brain areas simulated given a passive task FC matrix.

390

### 391 **Caveats and limitations of our study**

392 Different passive experimental conditions have been used in neuroimaging to study intrinsic  
393 brain activity (also referred to as the "resting state (RS)") ([Biswal, Yetkin, Haughton, & Hyde,  
394 1995](#); [Fox, Corbetta, Snyder, Vincent, & Raichle, 2006](#); [Greicius, Krasnow, Reiss, & Menon,  
395 2003](#)). Three of the conditions most commonly used as a resting state condition are passive  
396 fixation (PF), eyes open with no fixation, and eyes closed. Yan and colleagues ([Yan et al., 2009](#))  
397 found significantly higher FC in Default Mode Network (DMN) brain areas during eyes open  
398 than during eyes closed condition. It is also important to emphasize that the functional  
399 magnetic resonance (fMRI) results can vary depending on several other factors including: how a  
400 RS task is defined ([Van Dijk et al., 2010](#); [Yan et al., 2009](#)), which task instructions are given to  
401 subjects ([Benjamin et al., 2010](#)), and whether subjects were engaged in a task prior to RS

402 ([Waites, Stanislavsky, Abbott, & Jackson, 2005](#)). Thus, whereas one can compare (within the  
403 limitations outlined below) the results of our study with empirical studies using passive fixation,  
404 our results cannot be directly extrapolated to all RS-fMRI studies.

405  
406 One way in which the simulations presented here are different from our previous paper ([Ulloa  
407 & Horwitz, 2016](#)) is that the model response units have been relocated from prefrontal cortex  
408 to PreSMA. The relocation of the response units to PreSMA is based on an fMRI study by  
409 ([Pessoa, Gutierrez, Bandettini, & Ungerleider, 2002](#)), who found an increase in BOLD fMRI in  
410 the PreSMA area at the end of the delay period during a visual working memory task.

411 Additionally, a study by ([Petit, Courtney, Ungerleider, & Haxby, 1998](#)) has also demonstrated  
412 BOLD fMRI activity in the PreSMA area during a working memory task. The relocation from  
413 previous studies from our lab of the model response units to PreSMA makes biological sense as  
414 it better reflects the complexity of the task we are trying to simulate. The identification of  
415 realistic locations within the brain for each one of the model units is crucial as different  
416 locations of task-related modules will modulate different non-task nodes in the connectome,  
417 thereby producing different FC configurations.

418  
419 One of the limitations of our study is that our model connectome does not have other sensory  
420 systems apart from the visual system. Therefore, one should exercise caution when comparing  
421 FC matrices of our simulation to empirical ones as the empirical ones would contain higher FC  
422 that are the result of other sensory systems being activated by either intrinsic or extrinsic  
423 processes. For example, in an fMRI scanner room, there is significant auditory stimulation

424 (scanner noise) as well as somatosensory input, which we have not simulated in the present  
425 work.

426

427 In our simulations, we only embedded the visual model in the right hemisphere. As a result, the  
428 intrinsic activity was mostly localized to the right hemisphere. Nonetheless, there were  
429 significant intrinsic activity changes in the left hemisphere, and those were caused by structural  
430 connectivity between both hemispheres.

431

432 Another limitation of our study is that the weights of the structural connectome used in this  
433 paper are undirected and we assumed all connection weights to be excitatory. It is well known  
434 that diffusion tractography has serious limitations as it produces a significant number of false  
435 positives ([Maier-Hein et al., 2017](#)), has relatively low resolution and measures white tracts only  
436 indirectly ([Jbabdi, Sotiropoulos, Haber, Van Essen, & Behrens, 2015](#)). Some researchers have  
437 simulated whole brain activity using connectome datasets obtained from reconstructions of  
438 retrograde tracer injections in macaques ([Chaudhuri, Knoblauch, Gariel, Kennedy, & Wang,  
439 2015](#)) or a composite of diffusion spectrum imaging in humans and macaque tracer data ([Sanz-  
440 Leon et al., 2015](#)). Despite the low resolution and lack of sign and direction of the human  
441 tractography data, we decided to use it as it allowed the “brain regions” of our task-based  
442 simulator to be embedded into plausible locations within the structural connectome.

443

444 **CONCLUSIONS**

445 In conclusion, we used our large-scale neural modeling framework to quantitatively compare  
446 neural dynamics of non-task brain regions during passive fixation, passive viewing, and a visual  
447 short-term memory task. We were able to obtain quantitative measures of differences in  
448 simulated functional connectivity by using graph theoretical methods. Our simulated graph  
449 theory results largely agreed with experiments. We were also able to relate those network-level  
450 changes to the underlying model mechanisms. We showed that we can use computational  
451 modeling, functional connectivity and graph theoretical metrics to quantify changes in intrinsic  
452 FC of non-task brain regions due to increasing task demands. Our work is relevant to the  
453 characterization of intrinsic brain activity differences between passive and active task  
454 conditions and to the use of neural modeling in the design of empirical studies and the  
455 comparison of competing hypothesis of brain function.

456

## 457 **METHODS**

458 In the present work, we analyzed functional connectivity derived from BOLD fMRI time-series,  
459 calculated from simulated neural activity data using the framework presented in a previous  
460 paper ([Ulloa & Horwitz, 2016](#)). Whereas in our previous paper we evaluated the FC between  
461 brain regions directly involved in executing a task, in the present paper we examined the  
462 intrinsic FC in the rest of the brain (brain regions not involved in task execution). To better  
463 address that question, we performed a model parameter search to find a reasonable match  
464 between empirical and model FC. Below we briefly describe the components of the framework  
465 and how it was used to generate the simulated multi-subject experiment presented in this

466 study. The source code of our modeling work, including simulation, analysis and visualization  
467 scripts, is freely available at [https://nidcd.github.io/lsvm\\_in\\_python/](https://nidcd.github.io/lsvm_in_python/).

468

## 469 **Visual object processing model and The Virtual Brain**

### 470 *a. Visual object processing model*

471 Our in-house visual ([Tagamets & Horwitz, 1998](#)) object processing model consists of  
472 interconnected neuronal populations representing the cortical ventral pathway that has been  
473 shown to process primarily the features of a visual object. This stream begins in striate visual  
474 cortex, extends into the inferior temporal lobe and projects into ventrolateral prefrontal cortex  
475 ([Haxby et al., 1991](#); [McIntosh et al., 1994](#); [Ungerleider & Mishkin, 1982](#)). The regions that  
476 comprise the visual model include ones representing primary and secondary visual cortex  
477 (V1/V2), area V4, anterior inferotemporal cortex (IT), and prefrontal cortex (PFC) (see Fig. 1).  
478 Each of these regions contain one or more neural populations with different functional  
479 attributes (see caption to Fig. 1 for details). This model was designed to perform a short-term  
480 memory delayed match-to-sample (DMS) task during each trial of which a stimulus S1 is  
481 presented for a certain amount of time, followed by a delay period in which S1 must be kept in  
482 short-term memory. When a second stimulus (S2) is presented, the model must respond as to  
483 whether S2 matches S1. The model can also perform control tasks: passive fixation (PF) and  
484 passive perception of the stimuli (PV), in which no response is required. Multiple trials of the  
485 active and passive tasks constitute a simulated functional neuroimaging study.

486 The key feature used to define a visual object was shape. Model neurons in V1/V2 and  
487 V4 were assumed to be orientation selective (for simplicity, horizontal and vertical orientations

488 were used). The structural submodels employed were based on known monkey  
489 neuroanatomical data. An important assumption for the visual model, inferred from such  
490 experimental data, was that the spatial receptive field on neurons increased along the ventral  
491 processing pathway (see ([Tagamets & Horwitz, 1998](#)) for details).

492 Each neuronal population consisted of 81 microcircuits, each representing a cortical  
493 column. The model employed modified Wilson-Cowan units (an interacting excitatory and  
494 inhibitory pair of elements for which spike rate was the measure of output neural activity) as  
495 the microcircuit ([Wilson & Cowan, 1972](#)). The input synaptic activity to each neuronal unit can  
496 also be evaluated and combinations of this input activity were related to the fMRI BOLD signals  
497 via a forward model.

498 In an earlier version of the model ([Horwitz et al., 2005](#)), half the neural populations  
499 within the model were 'non task-specific' neurons that served as noise generators to 'task-  
500 specific' neurons that processed shapes during the DMS task. The model generated time series  
501 of simulated electrical neuronal and synaptic activity for each module that represents a brain  
502 region. The time series of synaptic activity, convolved with a hemodynamic response function,  
503 was then used to compute simulated fMRI BOLD signal for each module representing a brain  
504 region, as well as functional connectivity among key brain regions (see ([Horwitz et al., 2005](#)) for  
505 details on this method). This model was able to perform the DMS task, generate simulated  
506 neural activities in the various brain regions that matches empirical data from non-human  
507 preparations, and produces simulated functional neuroimaging data that generally agree with  
508 human experimental findings (see ([Tagamets & Horwitz, 1998](#)) and ([Horwitz et al., 2005](#)) for  
509 details). In the current paper, we employ the version of the model introduced by Ulloa and



510 Horwitz ([Ulloa & Horwitz, 2016](#)) in which non task-specific neurons are replaced by noise-  
511 generated activity from neural elements in The Virtual Brain software simulator ([Sanz Leon et](#)  
512 [al., 2013](#)).

513

#### 514 *b. The Virtual Brain*

515 The Virtual Brain (TVB) software ([Sanz Leon et al., 2013](#); [Sanz-Leon et al., 2015](#)) is a simulator of  
516 primarily resting state brain activity that combines: (i) white matter structural connections  
517 among brain regions to simulate long-range connections, and (ii) a given neuronal population  
518 model to simulate local brain activity. It also employs forward models that convert simulated  
519 neural activity into simulated functional neuroimaging data. TVB source code and  
520 documentation are freely available from <https://github.com/the-virtual-brain>.

521 In the current paper, for the structural model, we chose the DSI-based connectome described  
522 by ([Hagmann et al., 2008](#)), which contains 998 nodes. For the neural model for each node, we  
523 employed Wilson-Cowan population neuronal units ([Wilson & Cowan, 1972](#)) to model the local  
524 brain activity because our in-house LSNM simulators use modified Wilson-Cowan equations as  
525 their basic neuronal unit. Our forward model that converts simulated neural activity into  
526 simulated fMRI is a modification of the Balloon-Windkessel model of Friston et al. ([Friston,](#)  
527 [Mechelli, Turner, & Price, 2000](#); [Stephan, Marshall, Penny, Friston, & Fink, 2007](#)) that is  
528 included in the TVB.

529

#### 530 **Integrating TVB and LSNM**

531 To perform our computational study, we concurrently ran two neural simulators: Our Large-  
532 Scale Neural Model (LSNM) simulator, which generated task-driven neural activity of the brain  
533 regions directly involved in the visual DMS task, and The Virtual Brain simulator (TVB) ([Sanz](#)  
534 [Leon et al., 2013](#)) to generate resting-state neural activity in the brain regions not involved in  
535 the task. Because the task-based brain nodes were embedded within resting-state brain ROIs,  
536 we expected that the neuroimaging activity in key connectome ROIs would differ between  
537 passive fixation (PF), passive viewing (PV), and task-based simulations. Here, we sought to  
538 quantify those differences, first by comparing the pattern of functional connectivity across  
539 conditions, then by using graph theoretical methods to quantify those differences.

540 Within the LSNM, connections and parameter choices closely follow those in the original  
541 papers. Likewise, the connections and parameter choices among TVB nodes closely follow  
542 those described by Sanz-Leon et al. ([Sanz-Leon et al., 2015](#)). There are two differences between  
543 the simulations presented in this paper and the previous ([Ulloa & Horwitz, 2016](#)) paper: The  
544 location of the FR units has been changed to PreSMA and the global coupling parameter has  
545 been changed (after a parameter search procedure detailed below).

546 *a. Task-based model node placement in the TVB*

547 The connectome derived by Hagmann and colleagues ([Hagmann et al., 2008](#)) serves as a  
548 source of neural noise to our task-based neural model. Such a connectome was obtained by  
549 averaging the weighted network of five experimental subjects, where each one of the 998  
550 nodes represents a region of interest covering a surface area of approximately 1.5 cm<sup>2</sup>. The  
551 connection weights among the nodes represent cortico-cortical connections given by white

552 matter connection density among the given nodes. As stated above, each node is represented  
553 by a Wilson-Cowan population unit and thus each node is assumed to be comprised of one  
554 excitatory and one inhibitory neural population. We implemented noise as an additive term to  
555 the stochastic Euler integration scheme provided by the TVB software.

556

557         The locations of the four PFC nodes (FS, D1, D2, FR) require some comment. The  
558 inclusion of these four neural populations in the original LSNMs was based on the  
559 electrophysiological studies of Funahashi et al. ([Funahashi, Bruce, & Goldman-Rakic, 1990](#)) that  
560 found in monkey PFC four distinct neuronal responses during a delayed response task: neurons  
561 that (1) increased their activity when a stimulus was present (FS), (2) increased their activity  
562 during the delay part of the task (D1), (3) increased their activity during both when a stimulus  
563 was present and during the delay period (D2), and (4) increased their activity prior to making a  
564 correct response (FR). It is not known if these neuronal types are found in separate anatomical  
565 locations in PFC or are intermixed within the same brain area, although the latter is the more  
566 likely case (except possibly for the FR population). In the original modeling studies of Tagamets  
567 and Horwitz ([Tagamets & Horwitz, 1998](#)) and Husain et al. ([Husain, Tagamets, Fromm, Braun, &  
568 Horwitz, 2004](#)), the functional neuroimaging data represented a single region that included all  
569 four nodes. To illustrate the integrated synaptic activity and fMRI signal for each one of the  
570 modules of the combined LSNM / TVB model separately, we have assigned a different spatial  
571 location to each one of the four PFC sub-modules. We have used the Talairach coordinates of  
572 the prefrontal cortex, based on ([Haxby et al., 1991](#)), for the submodule D1 and have designated

573 spatial locations in adjacent regions of interest for the FS and D2 submodules. The FR  
574 submodule has been allocated to a spatial location determined by an fMRI study of working  
575 memory in humans ([Pessoa et al., 2002](#)). See Table 1 for coordinate locations of each  
576 module/submodule of the visual short-term memory nodes within the structural connectome.

577 *b. Simulating electrical activity and fMRI activity*

578 Electrical activities of each node in Hagmann's connectome (TVB equations)

579 Each one of the nodes in Hagmann's connectome is represented as a Wilson-Cowan  
580 model of excitatory (E) and inhibitory (I) neuronal populations, as described in Sanz-Leon et al.  
581 ([Sanz-Leon et al., 2015](#)):

582

$$\frac{dE_i}{dt} = \frac{1}{\tau_E} \left( -E_i + (k_E - r_E E_i) S_E \left[ \alpha_E \left( c_{EE} E_i - c_{IE} I_i - \theta_E + \Gamma(E_i, E, u_{ij}) \right) \right] \right)$$

583

584 and

585

$$\frac{dI_i}{dt} = \frac{1}{\tau_I} \left( -I_i + (k_I - r_I I_i) S_I \left[ \alpha_I \left( c_{EI} E_i - c_{II} I_i - \theta_I + \Gamma(E_i, E, u_{ij}) \right) \right] \right)$$

586

587 where  $S_E$  and  $S_I$  are sigmoid functions described by

588

$$S_a[f(\varphi)] = \frac{c}{1 + e^{(-a(f(\varphi_a) - b)}}$$

589

590  $c_{EE}, c_{EI}, c_{II}, c_{IE}$  are the connections within the single neuronal unit itself; note that, although  
 591 the original TVB Wilson-Cowan population model allows us to consider the influence of a local  
 592 neighborhood of neuronal populations, we have not used this feature in our current  
 593 simulations and have left that term out of the equations above;  $\Gamma(E_k, E, u_{kj})$  is the long-range  
 594 coupling function, defined as

595

$$\Gamma(E_i, E, u_{ij}) = a_\Gamma \left( \sum_{j=1}^l u_{ij} E_j(t - \tau_{ij}) + \sum_{j=1}^n u_{ij} E_j(t - \tau_{ij}) \right)$$

596

597 where  $l$  is the number of nodes in the connectome and  $n$  is the number of LSNM units  
 598 connected to a connectome node;  $a_\Gamma$  is a global coupling parameter (see Supplementary Table  
 599 S1 and Table S2 for the definition and value of the parameters in the above equations).

600

#### 601 Electrical activities of each LSNM unit

602 Each one of the submodules of the LSNM model contains 81 neuronal population units.

603 Each one of those units is modeled as a Wilson-Cowan population of excitatory ( $E$ ) and

604 inhibitory ( $I$ ) elements. The electrical activities of each one of those elements at time  $t$  is given

605 by the following equations:

606

$$\frac{dE_i(t)}{dt} = \Delta \left( \frac{1}{1 + e^{-K_E [w_{EE} E_i(t) + w_{IE} I_i(t) + in_{iE}(t) - \phi_E + N(t)]}} \right) - \delta E_i(t)$$

607

608 and

$$\frac{dI_i(t)}{dt} = \Delta \left( \frac{1}{1 + e^{-K_I[w_{EI}E_i(t) + in_{iI}(t) - \phi_I + N(t)]}} \right) - \delta I_i(t)$$

609

610 where  $\Delta$  is the rate of change,  $\delta$  is the rate of decay,  $K_E, K_I$  are gain constants,  $\phi_E, \phi_I$  are input  
 611 threshold values,  $N(t)$  is a noise term,  $w_{EE}, w_{IE}, w_{EI}$  are the weights within a unit (the values of  
 612  $\Delta, \delta, K, \tau, N$  are given in the Supplementary Table S3);  $in_{iE}(t), in_{iI}(t)$  are the inputs coming  
 613 from other brain regions at time  $t$ .  $in_{iE}(t)$  is given by:

614

$$in_{iE}(t) = \sum_j w_{ji}^E E_j(t) + \sum_j w_{ji}^I I_j(t) + \sum_j c_{ji} z_{ji}^C C_j(t)$$

615

616 where  $w_{ji}^E$  and  $w_{ji}^I$  are the weights originating from excitatory (E) or inhibitory (I) unit  $j$  from  
 617 another LSNM unit into the  $i$ th excitatory element,  $C_j$  is the connectome excitatory unit  $j$  with  
 618 connections to the LSNM unit  $i$ ,  $z_{ji}^C$  is the value of the anatomical connection weight from  
 619 connectome unit  $j$  to LSNM unit  $i$ , and  $c_{ji}$  is a coupling term, which was obtained by using  
 620 Python's Gaussian pseudo-random number generator (*random.gauss*), using  $a_T/81$  as the  
 621 mean value. The input coming into the  $i$ th inhibitory element,  $in_{iI}(t)$ , is given by:

622

$$in_{iI}(t) = \sum_k w_{ki}^E E_k(t) + \sum_k w_{ki}^I I_k(t)$$

623 where  $w_{ki}^E$  and  $w_{ki}^I$  are the weights originating from excitatory (E) or inhibitory (I) unit  $k$  from  
 624 another LSNM unit into the  $i$ th inhibitory element. Note that there are no connections from the  
 625 connectome to LSNM inhibitory units. See Supplementary Tables S4 and S5 for details. Note

626 also that, whereas TVB simulator incorporates transmission delay among the connectome  
627 nodes, the LSNM nodes do not.

### 628 Integrated synaptic activity

629 Prior to computing fMRI BOLD activities we compute the synaptic activity, spatially  
630 integrated over each LSNM module (or connectome node) and temporally integrated over 50  
631 milliseconds as described by ([Horwitz & Tagamets, 1999](#))

632

$$r_{SYN} = \sum_{t,i} IN_i(t)$$

633

634 where  $IN_i(t)$  is the sum of absolute values of all inputs to both  $E$  and  $I$  elements of unit  $i$ , at  
635 time  $t$ , and is given by:

636

$$IN_i(t) = w_{EE}E_i(t) + w_{EI}E_i(t) + |w_{IE}I_i(t)| + \sum_{k,i} w_{ki}E_k(t)$$

637

638 Note that the first three terms above are the synaptic weights from within unit  $i$  and the last  
639 term is the sum of synaptic connections originating in all other LSNM units and connectome  
640 nodes connected to unit  $i$ . Note also that, in our current scheme, there are no long-range  
641 connections from inhibitory populations.

642

643 Generation of subjects and task performance of the LSNM model

644 We generated simulated subjects by creating several different sets of connection  
645 weights among submodules of the LSNM visual network until we obtained the number of  
646 desired subjects whose task performance was above 60 percent. However, the weights among  
647 the nodes with the TVB connectome remained unchanged across subjects. The generation of  
648 different connectome sets to simulate individual subjects is outside the scope of the current  
649 paper but will be essential for future simulation studies investigating the effects of a behavioral  
650 task on non-task brain nodes. Task performance was measured as the proportion of correct  
651 responses over an experiment. A response in the response module (FR, described in the caption  
652 to Fig. 1) was considered a correct response in each trial if at least 2 units had neuronal  
653 electrical responses above a threshold of 0.7 during the response period. To create different  
654 sets of weights that were different from the ideal subject, we multiplied feedforward  
655 connections among modules in the LSNM visual model by a random proportion of between  
656 0.95 and 1.

657

#### 658 Equations for the forward fMRI BOLD model

659 We implemented the BOLD signal model described by ([Stephan et al., 2007](#)). We use the  
660 output of the integrated synaptic activity above as the neural state equation to the  
661 hemodynamic state equations below. The BOLD signal for each region of interest,  $y(t)$ , is  
662 computed as follows:

663

$$y(t) = V_0 \left( k_1(1 - q(t)) + k_2 \left( 1 - \frac{q(t)}{v(t)} \right) + k_3(1 - v(t)) \right).$$



664

665 where the coefficients  $k_1, k_2, k_3$  are computed as:

666

$$k_1 = 4.3\vartheta_0 E_0 TE$$

$$k_2 = \varepsilon r_0 E_0 TE$$

$$k_3 = 1 - \varepsilon$$

667

668 where  $V_0$  is the resting venous blood volume fraction,  $q$  is the deoxyhemoglobin content,  $v$  is  
669 the venous blood volume,  $E_0$  is the oxygen extraction fraction at rest,  $\varepsilon$  is the ratio of intra- and  
670 extravascular signals, and  $r_0$  is the slope of the relation between the intravascular relaxation  
671 rate and oxygen saturation,  $\vartheta_0$  is the frequency offset at the outer surface of the magnetized  
672 vessel for fully deoxygenated blood at 3T, and TE is the echo time. The evolution of the venous  
673 blood volume  $v$  and deoxyhemoglobin content  $q$  is given by the balloon model hemodynamic  
674 state equations, as follows:

675

$$\tau_0 \frac{dv}{dt} = f(t) - v(t)^{1/\alpha}$$

$$\tau_0 \frac{dq}{dt} = f(t) \frac{1 - (1 - E_0)^{1/f}}{E_0} - v(t)^{1/\alpha} \frac{q(t)}{v(t)}$$

676

677 where  $\tau_0$  is the hemodynamics transit time,  $\alpha$  represents the resistance of the venous balloon  
678 (vessel stiffness), and  $f(t)$  is the blood inflow at time  $t$  and is given by

679

$$\frac{df}{dt} = s$$

680

681 where  $s$  is an exponentially decaying, vasodilatory signal given by

682

$$\frac{ds}{dt} = \epsilon x(t) - \frac{s(t)}{\tau_s} - \frac{(f(t) - 1)}{\tau_f}$$

683

684 where  $\epsilon$  is the efficacy with which neuronal activity  $x(t)$  (i.e., integrated synaptic activity) causes

685 an increase in signal,  $\tau_s$  is the time constant for signal decay, and  $\tau_f$  is the time constant for

686 autoregulatory feedback from blood flow ([Friston et al., 2000](#)). See Supplementary Table S6 for

687 the values of the above parameters. The simulated fMRI BOLD time series resulting from the

688 above equations were low-pass filtered (<0.25Hz) and down-sampled every two seconds.

689

### 690 **Resting State parameter exploration**

691 We performed a global parameter exploration (for which we used exclusively the TVB simulator

692 and the structural connectome with no task nodes) to obtain a reasonable match between

693 empirical and model FC ([Cabral et al., 2011](#)). We obtained the empirical functional connectivity

694 datasets from ([Hagmann et al., 2008](#)) which we used as a target for our simulated FC. Note that

695 we used a low resolution (66 nodes) FC of matrices to perform the comparisons between

696 empirical and resting state simulations ([Honey et al., 2009](#)): We transformed all correlation

697 coefficients to Fisher's Z values and averaged the FC matrices across subjects within each

698 condition. We then calculated low-resolution (66 ROIs) matrices (each ROI corresponding to a

699 brain region in the Desikan-Killiany parcellation ([Desikan et al., 2006](#)) for each condition  
700 ([Hagmann et al., 2008](#); [Honey et al., 2009](#)) by averaging FC coefficients within each one of the  
701 low-resolution ROIs ([Hagmann et al., 2008](#)) and converted back to correlation coefficients using  
702 an inverse Fisher's Z transformation. We systematically varied the global coupling parameter  
703 ( $a_T$  in the long-range coupling equation above) and the white matter conduction speed and  
704 conducted a 198-second resting state simulation for each parameter combination. We  
705 calculated a Pearson correlation coefficient between the model FC matrix (for each parameter  
706 combination) and the empirical FC matrix. Then, we chose the parameter combination that  
707 gave us the highest correlation value and used that combination for the PF, PV and DMS  
708 simulations of our study. The global strength parameter range used was between 0.0042 and  
709 0.15 with a step of 0.01. The conduction speed parameter range used was between 1 and 10  
710 m/s with a step of 1. The best combination of parameters was (0.15, 3) which yielded a  
711 correlation value between simulated and empirical FC of  $r=0.37$ . Note that absent structural  
712 connections were removed from this correlation calculation as in ([Honey et al., 2009](#)), but not  
713 in the rest of the paper.

714

### 715 **From RS to PF, PV, and DMS**

716 After finding an optimal match between empirical and simulated RS, we performed a simulation  
717 of RS with stimulation in visual task nodes using only the TVB simulator ([Sanz-Leon et al., 2015](#)).  
718 The correlation between RS FC and RS with stimulation FC was 0.90. Subsequently, we used a  
719 blend of our LSNM simulator and TVB to simulated PF. The correlation between RS with  
720 stimulation and PF was 0.9. As a last step, we performed a DMS simulation and compared it to

721 the PF simulation (correlation was 0.79). Thus, we used a TVB RS simulation (matched to  
722 empirical RS) as a starting point for our PF and task-based simulations.

723

#### 724 **Network construction**

725 The simulations were performed using the TVB simulator with the 998-node Hagmann  
726 connectome and the LSNM visual short-term memory simulator described above. We isolated  
727 the synaptic activity timeseries of connectome nodes from the task nodes' synaptic activity. We  
728 used the Balloon model to estimate fMRI BOLD activation over each one of the 998 nodes, for  
729 each condition, and for each subject separately. We calculated zero lag Pearson correlation  
730 coefficients for each pair of the BOLD timeseries to obtain a FC matrix for each condition and  
731 for each subject. We used the weighted FC matrices within each condition to construct graphs  
732 where each one of the 998 ROIs corresponded to a graph node and the correlation coefficients  
733 between each pair of ROIs corresponded to graph edges ([Bolt, Nomi, et al., 2017](#); [Di et al.,  
734 2013](#)). To keep the same number of edges across conditions, we thresholded the network  
735 edges to a sparsity level of between 5% and 40% ([Di et al., 2013](#)) with a step size of 5%.

736

#### 737 **Graph theory analysis**

738 A set of eight graph theoretical metrics (global efficiency, local efficiency, clustering coefficient,  
739 characteristic path length, eigenvector centrality, betweenness centrality, participation  
740 coefficient, and modularity) were calculated using the FC matrices for each of the conditions  
741 using the Brain Connectivity Toolbox ([Rubinov & Sporns, 2010](#)) in Python, publicly available at  
742 <https://github.com/aestrivex/bctpy>. We calculated graph metrics for each individual FC matrix,

743 for each condition and for each density threshold. Then we calculated the average and standard  
744 deviation of each graph metric for each density threshold.

745 *Global efficiency* ([Latora & Marchiori, 2001](#)) measures “functional integration” ([Rubinov &](#)  
746 [Sporns, 2010](#)) and indicates how well nodes are coupled through functional connections across  
747 the entire brain. Global efficiency is calculated as the average inverse shortest path length  
748 ([Rubinov & Sporns, 2010](#)). *Local efficiency* is the inverse of the average shortest path  
749 connecting a given node to its neighbors ([Lee et al., 2017](#)). *Clustering coefficient* ([Watts &](#)  
750 [Strogatz, 1998](#)) is a measure of “functional segregation” ([Rubinov & Sporns, 2010](#)). The  
751 clustering coefficient of a network node is the proportion of the given node’s neighbors that are  
752 functionally connected to each other. Whole brain clustering coefficient is calculated as the  
753 average of the clustering coefficients in a functional connectivity matrix ([Rubinov & Sporns,](#)  
754 [2010](#)). *Characteristic path length* is the average shortest path length between all node pairs in a  
755 network ([Rubinov & Sporns, 2010](#)). *Eigenvector centrality* is a measure of centrality that  
756 considers degree of a given node and degree of that node’s neighbors ([Fornito, Zalesky, &](#)  
757 [Bullmore, 2016 2016](#)). Betweenness centrality is the fraction of shortest paths that cross a given  
758 network node ([Rubinov & Sporns, 2010](#)). *Participation coefficient* is a measure of each node’s  
759 participation in a given set of network communities. We used a set of six network communities  
760 for the participation coefficient calculation, as shown in Table S1 of ([Hagmann et al., 2008](#)),  
761 Table S1. *Modularity* ([Newman, 2004](#)) is a metric of functional segregation and it detects  
762 community structure in a network by dividing a functional connectivity matrix into sets of non-  
763 overlapping modules and it measures how well a network can be divided into those modules  
764 ([Rubinov & Sporns, 2010](#)).

765

766 **SUPPORTING INFORMATION**

767 Table S1. Parameters used in the Wilson-Cowan equation for each connectome within TVB.

768 Table S2. Parameters used for simulating the Hagmann connectome within the TVB simulator.

769 Table S3. Parameters used in the Wilson-Cowan unit model of each LSNM submodule.

770 Table S4. Connection patterns among submodules of the LSNM model.

771 Table S5. Connection weights among submodules in the prefrontal cortex regions of LSNM.

772 Table S6. Parameters used for the Balloon model of hemodynamic response.

773

774 **ACKNOWLEDGEMENTS**

775 This research was funded by the Division of Intramural Research of the National Institute on

776 Deafness and Other Communication Disorders. We thank Olaf Sporns and Chris Honey for

777 sharing the functional and structural connectivity data sets from their empirical studies used in

778 the present paper. We thank Paul Corbitt for useful discussions related to the simulation code

779 used for our analysis and the parameters used for converting synaptic activity to fMRI BOLD

780 time-series. We thank Marmaduke Woodman for helping us navigate technical aspects of the

781 TVB simulator.

782

783 **REFERENCES**

784 Adams, R. A., Shipp, S., & Friston, K. J. (2013). Predictions not commands: active inference in

785 the motor system. *Brain Struct Funct*, 218(3), 611-643. doi:10.1007/s00429-012-0475-5

- 786 Banerjee, A., Pillai, A. S., & Horwitz, B. (2012). Using large-scale neural models to interpret  
787 connectivity measures of cortico-cortical dynamics at millisecond temporal resolution.  
788 *Front Syst Neurosci*, 5, 102. Retrieved from  
789 <https://www.ncbi.nlm.nih.gov/pmc/articles/PMC3258667/pdf/fnsys-05-00102.pdf>  
790 doi:10.3389/fnsys.2011.00102
- 791 Bastian, M., Heymann, S., & Jacomy, M. (2009). Gephi: an open source software for exploring  
792 and manipulating networks. *International AAAI conference on weblogs and social media*,  
793 361-362.
- 794 Benjamin, C., Lieberman, D. A., Chang, M., Ofen, N., Whitfield-Gabrieli, S., Gabrieli, J. D., &  
795 Gaab, N. (2010). The influence of rest period instructions on the default mode network.  
796 *Front Hum Neurosci*, 4, 218. doi:10.3389/fnhum.2010.00218
- 797 Biswal, B., Yetkin, F. Z., Haughton, V. M., & Hyde, J. S. (1995). Functional connectivity in the  
798 motor cortex of resting human brain using echo-planar MRI. *Magn Reson Med*, 34(4),  
799 537-541.
- 800 Blondel, V. D., Guillaume, J.-L., Lambiotte, R., & Lefebvre, E. (2008). Fast unfolding of  
801 communities in large networks. *J. Stat. Mech.*(2008), P10008. doi:DOI: 10.1088/1742-  
802 5468/2008/10/P10008
- 803 Bluhm, R. L., Clark, C. R., McFarlane, A. C., Moores, K. A., Shaw, M. E., & Lanius, R. A. (2011).  
804 Default network connectivity during a working memory task. *Hum Brain Mapp*, 32(7),  
805 1029-1035. doi:10.1002/hbm.21090
- 806 Bolt, T., Anderson, M. L., & Uddin, L. Q. (2017). Beyond the evoked/intrinsic neural process  
807 dichotomy. *Network Neuroscience*, 0(0), 1-22. doi:10.1162/NETN\_a\_00028

- 808 Bolt, T., Nomi, J. S., Rubinov, M., & Uddin, L. Q. (2017). Correspondence between evoked and  
809 intrinsic functional brain network configurations. *Hum Brain Mapp.*  
810 doi:10.1002/hbm.23500
- 811 Branco, P., Seixas, D., Deprez, S., Kovacs, S., Peeters, R., Castro, S. L., & Sunaert, S. (2016).  
812 Resting-State Functional Magnetic Resonance Imaging for Language Preoperative  
813 Planning. *Front Hum Neurosci*, 10, 11. doi:10.3389/fnhum.2016.00011
- 814 Buckner, R. L., Sepulcre, J., Talukdar, T., Krienen, F. M., Liu, H., Hedden, T., . . . Johnson, K. A.  
815 (2009). Cortical hubs revealed by intrinsic functional connectivity: mapping, assessment  
816 of stability, and relation to Alzheimer's disease. *J Neurosci*, 29(6), 1860-1873.  
817 doi:10.1523/JNEUROSCI.5062-08.2009
- 818 Cabral, J., Hugues, E., Sporns, O., & Deco, G. (2011). Role of local network oscillations in resting-  
819 state functional connectivity. [Yes-HL]. *Neuroimage*, 57(1), 130-139. doi:S1053-  
820 8119(11)00388-0 [pii]  
821 10.1016/j.neuroimage.2011.04.010
- 822 Chaudhuri, R., Knoblauch, K., Gariel, M. A., Kennedy, H., & Wang, X. J. (2015). A Large-Scale  
823 Circuit Mechanism for Hierarchical Dynamical Processing in the Primate Cortex. *Neuron*,  
824 88(2), 419-431. doi:10.1016/j.neuron.2015.09.008
- 825 Cohen, J. R., & D'Esposito, M. (2016). The Segregation and Integration of Distinct Brain  
826 Networks and Their Relationship to Cognition. *J Neurosci*, 36(48), 12083-12094.  
827 doi:10.1523/JNEUROSCI.2965-15.2016



- 828 Cole, M. W., Bassett, D. S., Power, J. D., Braver, T. S., & Petersen, S. E. (2014). Intrinsic and task-  
829 evoked network architectures of the human brain. *Neuron*, *83*(1), 238-251.  
830 doi:10.1016/j.neuron.2014.05.014
- 831 Cole, M. W., Ito, T., Bassett, D. S., & Schultz, D. H. (2016). Activity flow over resting-state  
832 networks shapes cognitive task activations. *Nat Neurosci*, *19*(12), 1718-1726.  
833 doi:10.1038/nn.4406
- 834 Corbitt, P. T., Ulloa, A., & Horwitz, B. (2018). Simulating laminar neuroimaging data for a visual  
835 delayed match-to-sample task. *Neuroimage*, *173*, 199-222.  
836 doi:10.1016/j.neuroimage.2018.02.037
- 837 DeSalvo, M. N., Douw, L., Takaya, S., Liu, H., & Stufflebeam, S. M. (2014). Task-dependent  
838 reorganization of functional connectivity networks during visual semantic decision  
839 making. *Brain Behav*, *4*(6), 877-885. doi:10.1002/brb3.286
- 840 Desikan, R. S., Segonne, F., Fischl, B., Quinn, B. T., Dickerson, B. C., Blacker, D., . . . Killiany, R. J.  
841 (2006). An automated labeling system for subdividing the human cerebral cortex on MRI  
842 scans into gyral based regions of interest. *Neuroimage*, *31*(3), 968-980.  
843 doi:10.1016/j.neuroimage.2006.01.021
- 844 Di, X., Gohel, S., Kim, E. H., & Biswal, B. B. (2013). Task vs. rest-different network configurations  
845 between the coactivation and the resting-state brain networks. *Front Hum Neurosci*, *7*,  
846 493. doi:10.3389/fnhum.2013.00493
- 847 Fornito, A., Zalesky, A., & Bullmore, E. T. (2016). *Fundamental of brain network analysis*.  
848 Amsterdam ; Boston: Elsevier/Academic Press.

- 849 Fox, M. D., Corbetta, M., Snyder, A. Z., Vincent, J. L., & Raichle, M. E. (2006). Spontaneous  
850 neuronal activity distinguishes human dorsal and ventral attention systems. *Proc Natl*  
851 *Acad Sci U S A*, *103*(26), 10046-10051. doi:10.1073/pnas.0604187103
- 852 Friston, K. J., Mechelli, A., Turner, R., & Price, C. J. (2000). Nonlinear responses in fMRI: the  
853 Balloon model, Volterra kernels, and other hemodynamics. *Neuroimage*, *12*(4), 466-477.  
854 doi:10.1006/nimg.2000.0630
- 855 Fuertinger, S., Horwitz, B., & Simonyan, K. (2015). The Functional Connectome of Speech  
856 Control. *PLoS Biol*, *13*(7), e1002209. doi:10.1371/journal.pbio.1002209
- 857 Funahashi, S., Bruce, C. J., & Goldman-Rakic, P. S. (1990). Visuospatial coding in primate  
858 prefrontal neurons revealed by oculomotor paradigms. *J Neurophysiol*, *63*(4), 814-831.  
859 doi:10.1152/jn.1990.63.4.814
- 860 Ghosh, A., Rho, Y., McIntosh, A. R., Kotter, R., & Jirsa, V. K. (2008). Noise during rest enables the  
861 exploration of the brain's dynamic repertoire. *PLoS Comput Biol*, *4*(10), e1000196.  
862 doi:10.1371/journal.pcbi.1000196
- 863 Gilson, M., Moreno-Bote, R., Ponce-Alvarez, A., Ritter, P., & Deco, G. (2016). Estimation of  
864 Directed Effective Connectivity from fMRI Functional Connectivity Hints at Asymmetries  
865 of Cortical Connectome. *PLoS Comput Biol*, *12*(3), e1004762.  
866 doi:10.1371/journal.pcbi.1004762
- 867 Greicius, M. D., Krasnow, B., Reiss, A. L., & Menon, V. (2003). Functional connectivity in the  
868 resting brain: a network analysis of the default mode hypothesis. *Proc Natl Acad Sci U S*  
869 *A*, *100*(1), 253-258. doi:10.1073/pnas.0135058100

- 870 Haggmann, P., Cammoun, L., Gigandet, X., Meuli, R., Honey, C. J., Wedeen, V. J., & Sporns, O.  
871 (2008). Mapping the structural core of human cerebral cortex. *PLoS Biol*, 6(7), e159.  
872 doi:10.1371/journal.pbio.0060159
- 873 Hansen, E. C., Battaglia, D., Spiegler, A., Deco, G., & Jirsa, V. K. (2015). Functional connectivity  
874 dynamics: modeling the switching behavior of the resting state. *Neuroimage*, 105, 525-  
875 535. doi:10.1016/j.neuroimage.2014.11.001
- 876 Havlicek, M., Roebroeck, A., Friston, K., Gardumi, A., Ivanov, D., & Uludag, K. (2015).  
877 Physiologically informed dynamic causal modeling of fMRI data. *Neuroimage*, 122, 355-  
878 372. doi:10.1016/j.neuroimage.2015.07.078
- 879 Haxby, J. V., Grady, C. L., Horwitz, B., Ungerleider, L. G., Mishkin, M., Carson, R. E., . . . Rapoport,  
880 S. I. (1991). Dissociation of object and spatial visual processing pathways in human  
881 extrastriate cortex. *Proc. Natl. Acad. Sci. USA*, 88, 1621-1625.
- 882 Haxby, J. V., Ungerleider, L. G., Horwitz, B., Rapoport, S. I., & Grady, C. L. (1995). Hemispheric  
883 differences in neural systems for face working memory: A PET-rCBF study. *Human Brain*  
884 *Mapp.*, 3(2), 68-82. doi:DOI 10.1002/hbm.460030204
- 885 Heinzle, J., Koopmans, P. J., den Ouden, H. E., Raman, S., & Stephan, K. E. (2016). A  
886 hemodynamic model for layered BOLD signals. *Neuroimage*, 125, 556-570.  
887 doi:10.1016/j.neuroimage.2015.10.025
- 888 Honey, C. J., Sporns, O., Cammoun, L., Gigandet, X., Thiran, J. P., Meuli, R., & Haggmann, P.  
889 (2009). Predicting human resting-state functional connectivity from structural  
890 connectivity. *Proc Natl Acad Sci U S A*, 106(6), 2035-2040. doi:10.1073/pnas.0811168106

- 891 Horwitz, B., & Tagamets, M.-A. (1999). Predicting human functional maps with neural net  
892 modeling. *Human Brain Mapp.*, *8*, 137-142.
- 893 Horwitz, B., Warner, B., Fitzer, J., Tagamets, M. A., Husain, F. T., & Long, T. W. (2005).  
894 Investigating the neural basis for functional and effective connectivity. Application to  
895 fMRI. *Philos Trans R Soc Lond B Biol Sci*, *360*(1457), 1093-1108.  
896 doi:10.1098/rstb.2005.1647
- 897 Husain, F. T., Tagamets, M. A., Fromm, S. J., Braun, A. R., & Horwitz, B. (2004). Relating neuronal  
898 dynamics for auditory object processing to neuroimaging activity: a computational  
899 modeling and an fMRI study. *Neuroimage*, *21*(4), 1701-1720.  
900 doi:10.1016/j.neuroimage.2003.11.012
- 901 Jbabdi, S., Sotiropoulos, S. N., Haber, S. N., Van Essen, D. C., & Behrens, T. E. (2015). Measuring  
902 macroscopic brain connections in vivo. *Nat Neurosci*, *18*(11), 1546-1555.  
903 doi:10.1038/nn.4134
- 904 Krienen, F. M., Yeo, B. T., & Buckner, R. L. (2014). Reconfigurable task-dependent functional  
905 coupling modes cluster around a core functional architecture. *Philos Trans R Soc Lond B*  
906 *Biol Sci*, *369*(1653). doi:10.1098/rstb.2013.0526
- 907 Latora, V., & Marchiori, M. (2001). Efficient behavior of small-world networks. *Phys Rev Lett*,  
908 *87*(19), 198701. doi:10.1103/PhysRevLett.87.198701
- 909 Lee, W. H., Bullmore, E., & Frangou, S. (2017). Quantitative evaluation of simulated functional  
910 brain networks in graph theoretical analysis. *Neuroimage*, *146*, 724-733.  
911 doi:10.1016/j.neuroimage.2016.08.050

- 912 Liu, H., Buckner, R. L., Talukdar, T., Tanaka, N., Madsen, J. R., & Stufflebeam, S. M. (2009). Task-  
913 free presurgical mapping using functional magnetic resonance imaging intrinsic activity.  
914 *J Neurosurg*, *111*(4), 746-754. doi:10.3171/2008.10.JNS08846
- 915 Liu, Q., Ulloa, A., & Horwitz, B. (2017). Using a Large-scale Neural Model of Cortical Object  
916 Processing to Investigate the Neural Substrate for Managing Multiple Items in Short-  
917 term Memory. *J Cogn Neurosci*, *29*(11), 1860-1876. doi:10.1162/jocn\_a\_01163
- 918 Maier-Hein, K. H., Neher, P. F., Houde, J. C., Cote, M. A., Garyfallidis, E., Zhong, J., . . .  
919 Descoteaux, M. (2017). The challenge of mapping the human connectome based on  
920 diffusion tractography. *Nat Commun*, *8*(1), 1349. doi:10.1038/s41467-017-01285-x
- 921 McIntosh, A. R., Grady, C. L., Ungerleider, L. G., Haxby, J. V., Rapoport, S. I., & Horwitz, B.  
922 (1994). Network analysis of cortical visual pathways mapped with PET. *J. Neurosci.*, *14*,  
923 655-666.
- 924 Meunier, D., Fonlupt, P., Saive, A. L., Plailly, J., Ravel, N., & Royet, J. P. (2014). Modular structure  
925 of functional networks in olfactory memory. *Neuroimage*, *95*, 264-275.  
926 doi:10.1016/j.neuroimage.2014.03.041
- 927 Moussa, M. N., Vechlekar, C. D., Burdette, J. H., Steen, M. R., Hugenschmidt, C. E., & Laurienti,  
928 P. J. (2011). Changes in cognitive state alter human functional brain networks. *Front*  
929 *Hum Neurosci*, *5*, 83. doi:10.3389/fnhum.2011.00083
- 930 Newman, M. E. (2004). Fast algorithm for detecting community structure in networks. *Phys Rev*  
931 *E Stat Nonlin Soft Matter Phys*, *69*(6 Pt 2), 066133. doi:10.1103/PhysRevE.69.066133
- 932 Obata, T., Liu, T. T., Miller, K. L., Luh, W.-M., Wong, E. C., Frank, L. R., & Buxton, R. B. (2004).  
933 Discrepancies between BOLD and flow dynamics in primary and supplementary motor

- 934 areas: application of the balloon model to the interpretation of BOLD transients.  
935 *Neuroimage*, 21(1), 144-153. doi:10.1016/j.neuroimage.2003.08.040
- 936 Pessoa, L., Gutierrez, E., Bandettini, P., & Ungerleider, L. (2002). Neural correlates of visual  
937 working memory: fMRI amplitude predicts task performance. *Neuron*, 35(5), 975-987.
- 938 Petit, L., Courtney, S. M., Ungerleider, L. G., & Haxby, J. V. (1998). Sustained activity in the  
939 medial wall during working memory delays. *J Neurosci*, 18(22), 9429-9437.
- 940 Ponce-Alvarez, A., He, B. J., Hagmann, P., & Deco, G. (2015). Task-Driven Activity Reduces the  
941 Cortical Activity Space of the Brain: Experiment and Whole-Brain Modeling. [Yes-HL].  
942 *PLoS Comput Biol*, 11(8), e1004445. doi:10.1371/journal.pcbi.1004445
- 943 Roy, D., Sigala, R., Breakspear, M., McIntosh, A. R., Jirsa, V. K., Deco, G., & Ritter, P. (2014).  
944 Using the virtual brain to reveal the role of oscillations and plasticity in shaping brain's  
945 dynamical landscape. *Brain Connect*, 4(10), 791-811. doi:10.1089/brain.2014.0252
- 946 Rubinov, M., & Sporns, O. (2010). Complex network measures of brain connectivity: uses and  
947 interpretations. *Neuroimage*, 52(3), 1059-1069. doi:10.1016/j.neuroimage.2009.10.003
- 948 Sanz Leon, P., Knock, S. A., Woodman, M. M., Domide, L., Mersmann, J., McIntosh, A. R., & Jirsa,  
949 V. (2013). The Virtual Brain: a simulator of primate brain network dynamics. [Yes-HL].  
950 *Front Neuroinform*, 7, 10. doi:10.3389/fninf.2013.00010
- 951 Sanz-Leon, P., Knock, S. A., Spiegler, A., & Jirsa, V. K. (2015). Mathematical framework for large-  
952 scale brain network modeling in The Virtual Brain. *Neuroimage*, 111, 385-430.  
953 doi:10.1016/j.neuroimage.2015.01.002

- 954 Smith, S. M., Fox, P. T., Miller, K. L., Glahn, D. C., Fox, P. M., Mackay, C. E., . . . Beckmann, C. F.  
955 (2009). Correspondence of the brain's functional architecture during activation and rest.  
956 *Proc Natl Acad Sci U S A*, *106*(31), 13040-13045. doi:10.1073/pnas.0905267106
- 957 Stephan, K. E., Marshall, J. C., Penny, W. D., Friston, K. J., & Fink, G. R. (2007). Interhemispheric  
958 integration of visual processing during task-driven lateralization. *J Neurosci*, *27*(13),  
959 3512-3522. doi:10.1523/JNEUROSCI.4766-06.2007
- 960 Stevens, A. A., Tappon, S. C., Garg, A., & Fair, D. A. (2012). Functional brain network modularity  
961 captures inter- and intra-individual variation in working memory capacity. *PLoS One*,  
962 *7*(1), e30468. doi:10.1371/journal.pone.0030468
- 963 Tagamets, M.-A., & Horwitz, B. (1998). Integrating electrophysiological and anatomical  
964 experimental data to create a large-scale model that simulates a delayed match-to-  
965 sample human brain imaging study. *Cereb. Cortex*, *8*, 310-320.
- 966 Tomasi, D., Wang, R., Wang, G. J., & Volkow, N. D. (2014). Functional connectivity and brain  
967 activation: a synergistic approach. *Cereb Cortex*, *24*(10), 2619-2629.  
968 doi:10.1093/cercor/bht119
- 969 Tommasin, S., Mascali, D., Gili, T., Assan, I. E., Moraschi, M., Fratini, M., . . . Giove, F. (2017).  
970 Task-Related Modulations of BOLD Low-Frequency Fluctuations within the Default  
971 Mode Network. *Front Phys*, *5*. doi:10.3389/fphy.2017.00031
- 972 Ulloa, A., & Horwitz, B. (2016). Embedding Task-Based Neural Models into a Connectome-Based  
973 Model of the Cerebral Cortex. *Front Neuroinform*, *10*, 32. doi:10.3389/fninf.2016.00032

- 974 Ungerleider, L. G., & Mishkin, M. (1982). Two cortical visual systems. In D. J. Ingle, M. A.  
975 Goodale, & R. J. W. Mansfield (Eds.), *Analysis of Visual Behavior* (pp. 549-586).  
976 Cambridge: MIT Press.
- 977 Van Dijk, K. R., Hedden, T., Venkataraman, A., Evans, K. C., Lazar, S. W., & Buckner, R. L. (2010).  
978 Intrinsic functional connectivity as a tool for human connectomics: theory, properties,  
979 and optimization. *J Neurophysiol*, *103*(1), 297-321. doi:10.1152/jn.00783.2009
- 980 Vatansever, D., Menon, D. K., Manktelow, A. E., Sahakian, B. J., & Stamatakis, E. A. (2015).  
981 Default mode network connectivity during task execution. *Neuroimage*, *122*, 96-104.  
982 doi:10.1016/j.neuroimage.2015.07.053
- 983 Waites, A. B., Stanislavsky, A., Abbott, D. F., & Jackson, G. D. (2005). Effect of prior cognitive  
984 state on resting state networks measured with functional connectivity. *Hum Brain*  
985 *Mapp*, *24*(1), 59-68. doi:10.1002/hbm.20069
- 986 Watts, D. J., & Strogatz, S. H. (1998). Collective dynamics of 'small-world' networks. *Nature*,  
987 *393*(6684), 440-442. doi:10.1038/30918
- 988 Wen, X., Zhang, D., Liang, B., Zhang, R., Wang, Z., Wang, J., . . . Huang, R. (2015).  
989 Reconfiguration of the Brain Functional Network Associated with Visual Task Demands.  
990 *PLoS One*, *10*(7), e0132518. doi:10.1371/journal.pone.0132518
- 991 Wilson, H. R., & Cowan, J. D. (1972). Excitatory and inhibitory interactions in localized  
992 populations of model neurons. *Biophys. J.*, *12*, 1-24.
- 993 Yan, C., Liu, D., He, Y., Zou, Q., Zhu, C., Zuo, X., . . . Zang, Y. (2009). Spontaneous brain activity in  
994 the default mode network is sensitive to different resting-state conditions with limited  
995 cognitive load. *PLoS One*, *4*(5), e5743. doi:10.1371/journal.pone.0005743



996 Yeo, B. T., Krienen, F. M., Sepulcre, J., Sabuncu, M. R., Lashkari, D., Hollinshead, M., . . . Buckner,  
997 R. L. (2011). The organization of the human cerebral cortex estimated by intrinsic  
998 functional connectivity. *J Neurophysiol*, *106*(3), 1125-1165. doi:10.1152/jn.00338.2011  
999 Yue, Q., Martin, R. C., Fischer-Baum, S., Ramos-Nunez, A. I., Ye, F., & Deem, M. W. (2017). Brain  
1000 Modularity Mediates the Relation between Task Complexity and Performance. *J Cogn*  
1001 *Neurosci*, *29*(9), 1532-1546. doi:10.1162/jocn\_a\_01142  
1002  
1003

1004 **Table 1.** Hypothesized locations, in Talairach coordinates, of visual LSM modules, along with  
1005 the closest node in the Hagmann et al. connectome. Note that the locations of FS and D2 are  
1006 not explicitly known (see text) and were chosen only to demonstrate validity of the method.  
1007

| Visual submodule | Talairach location                          | Source                                                                       | Host connectome node |
|------------------|---------------------------------------------|------------------------------------------------------------------------------|----------------------|
| V1/V2            | (18, -88, 8)                                | ( <a href="#">Haxby, Ungerleider, Horwitz, Rapoport, &amp; Grady, 1995</a> ) | (14, -86, 7)         |
| V4               | (30, -72, -12)                              | ( <a href="#">Haxby et al., 1995</a> )                                       | (33, -70, -7)        |
| IT               | (28, -36, -8)                               | ( <a href="#">Haxby et al., 1995</a> )                                       | (31, -39, -6)        |
| FS               | Location selected for illustrative purposes |                                                                              | (47, 19, 9)          |
| D1               | (42, 26, 20)                                | ( <a href="#">Haxby et al., 1995</a> )                                       | (43, 29, 21)         |
| D2               | Location selected for illustrative purposes |                                                                              | (42, 39, 2)          |
| FR               | (1, 7, 48)                                  | ( <a href="#">Pessoa et al., 2002</a> )                                      | (8, 6, 50)           |

1008  
1009

1010

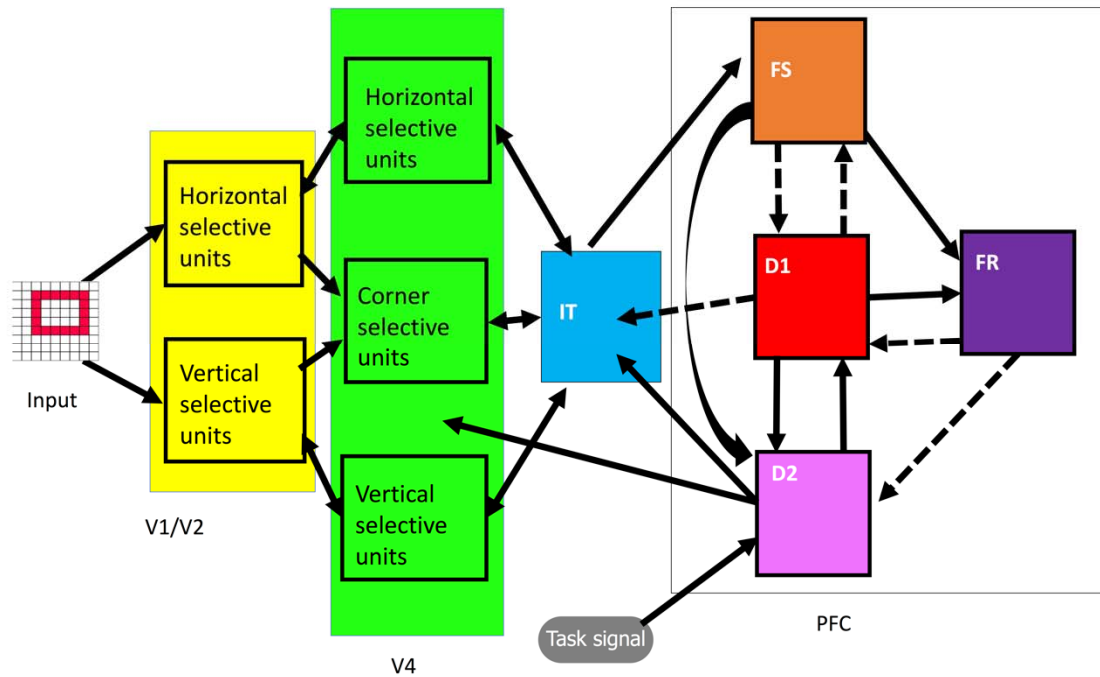

1011

1012

**Figure 1.** Visual short-term memory model consisted of interconnected neural populations that

1013

represent primary and secondary visual (V1/V2, V4), inferotemporal (IT), and prefrontal cortex

1014

(PFC). Each one of the sub-modules (shown above as squares) within a given brain module is

1015

modeled with 81 (9x9) modified Wilson-Cowan neuronal population units. Solid arrows

1016

represent Excitatory to Excitatory connections and dashed arrows represent Excitatory to

1017

Inhibitory connections. Adapted from ([Horwitz et al., 2005](#)).

1018

1019

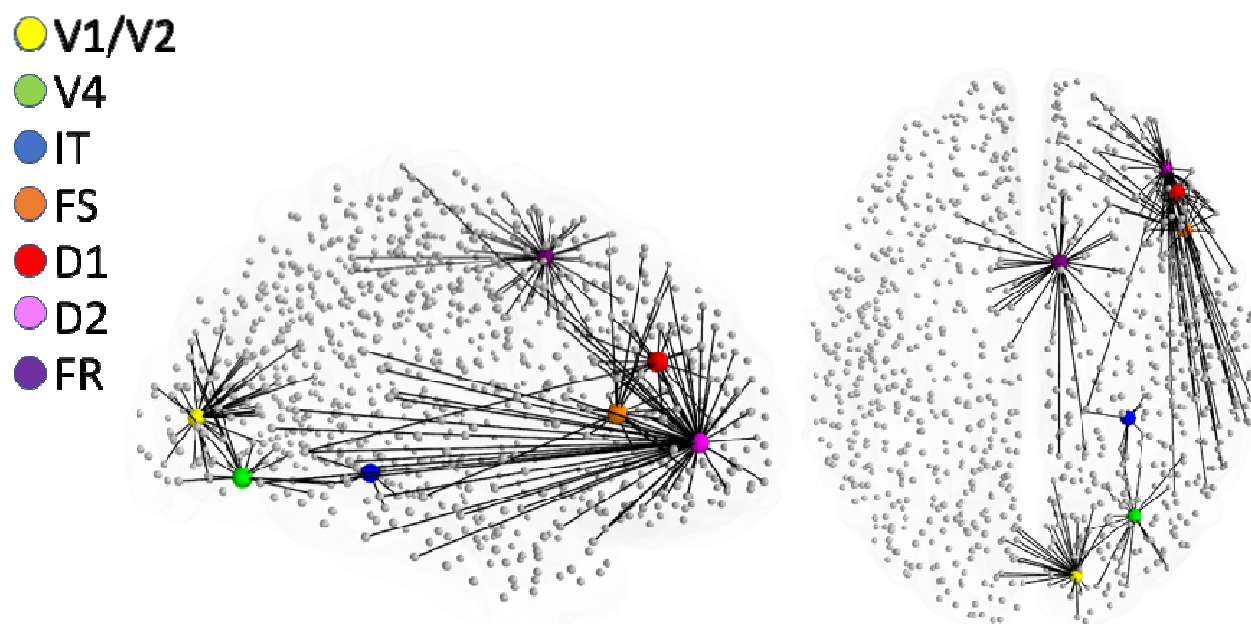

1020

1021 **Figure 2.** Graphical representation of the location where each of the visual short-term memory

1022 nodes was embedded within Hagmann's connectome ([Hagmann et al., 2008](#)). Also

1023 shown are direct anatomical connections to connectome nodes from each one of the

1024 embedded LSNM nodes.

1025

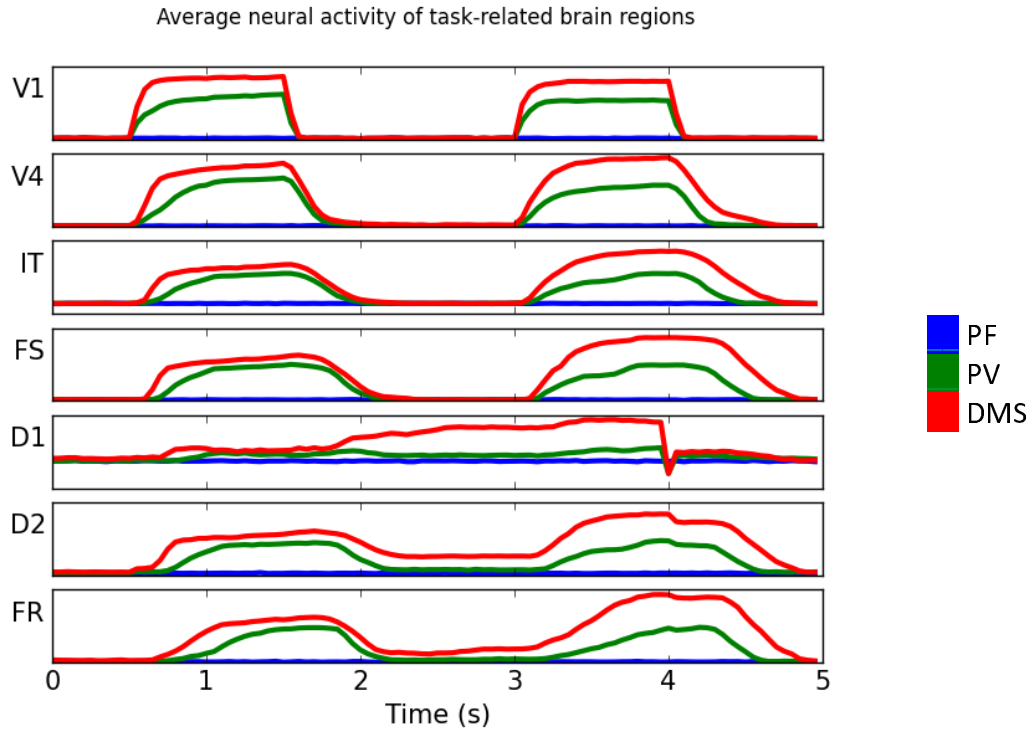

1026  
1027

1028 **Figure 3.** Typical electrical and in neuronal populations of task-related brain regions during one  
1029 trail of each of the simulated conditions. Key: PF (blue line), PV (green line), DMS (red line).  
1030 What is shown is the average across all cortical columns in a brain region.

1031

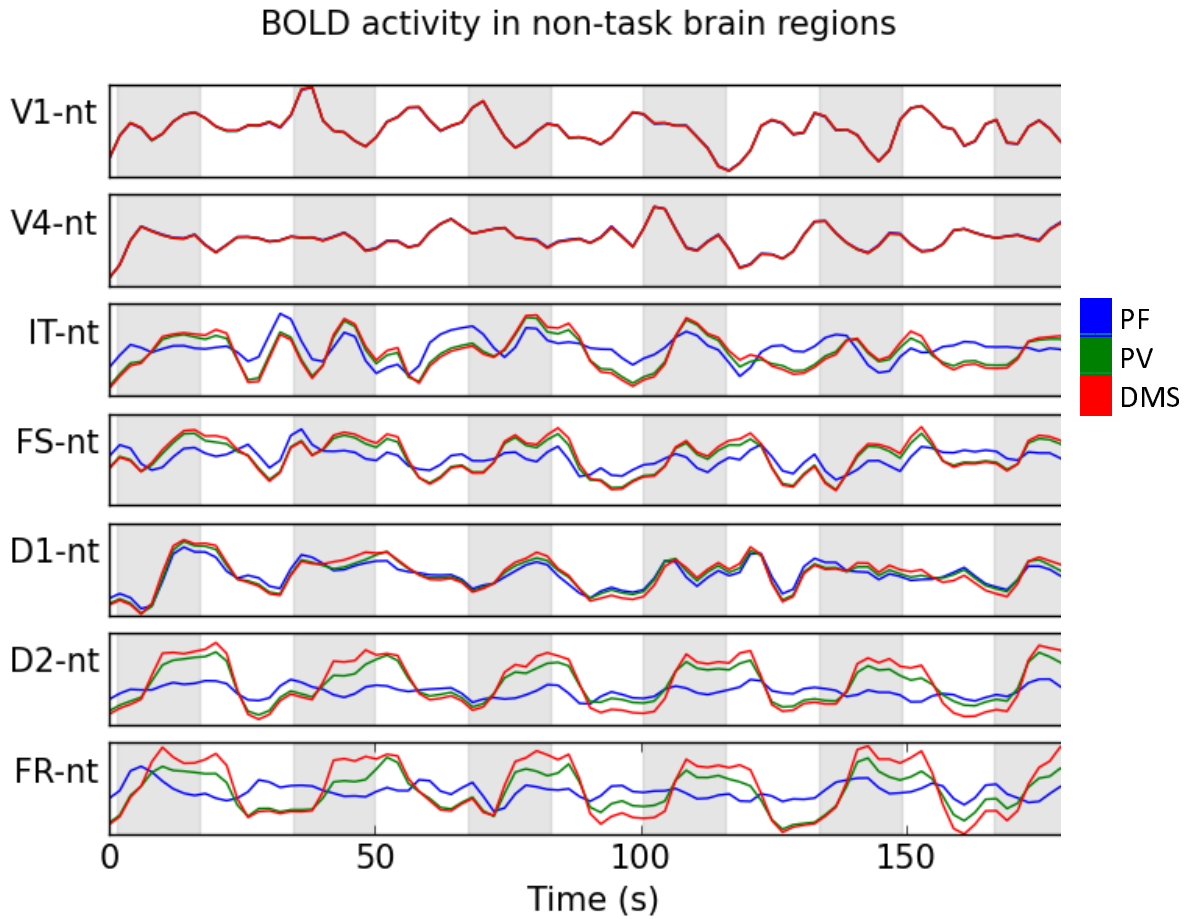

1032

1033

1034

1035

1036

Figure 4. Average BOLD signal of non-task brain regions with direct connections to task related brain regions. A complete trial corresponding to 91 scans is shown above. for the PV and DMS conditions, each experiment above contains 6 task blocks (shaded regions) interspersed with rest blocks.

1037

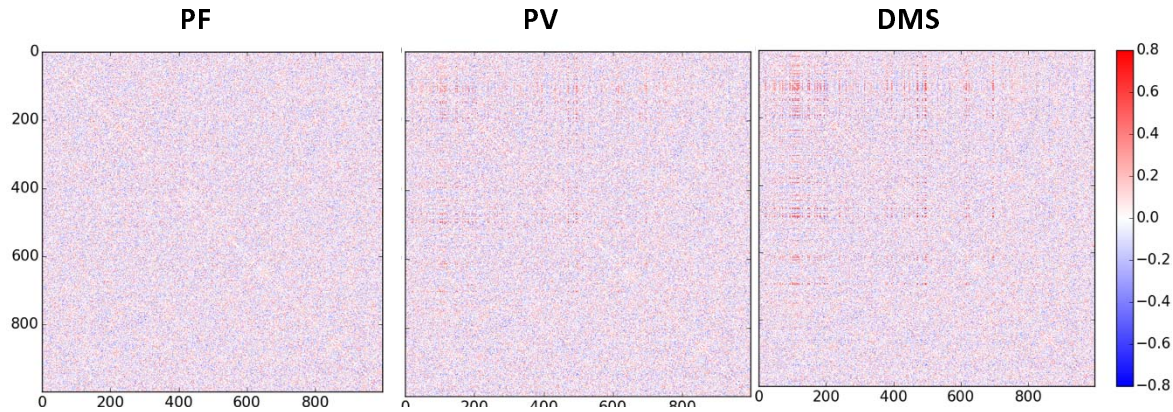

1038

1039

1040

1041

(A)

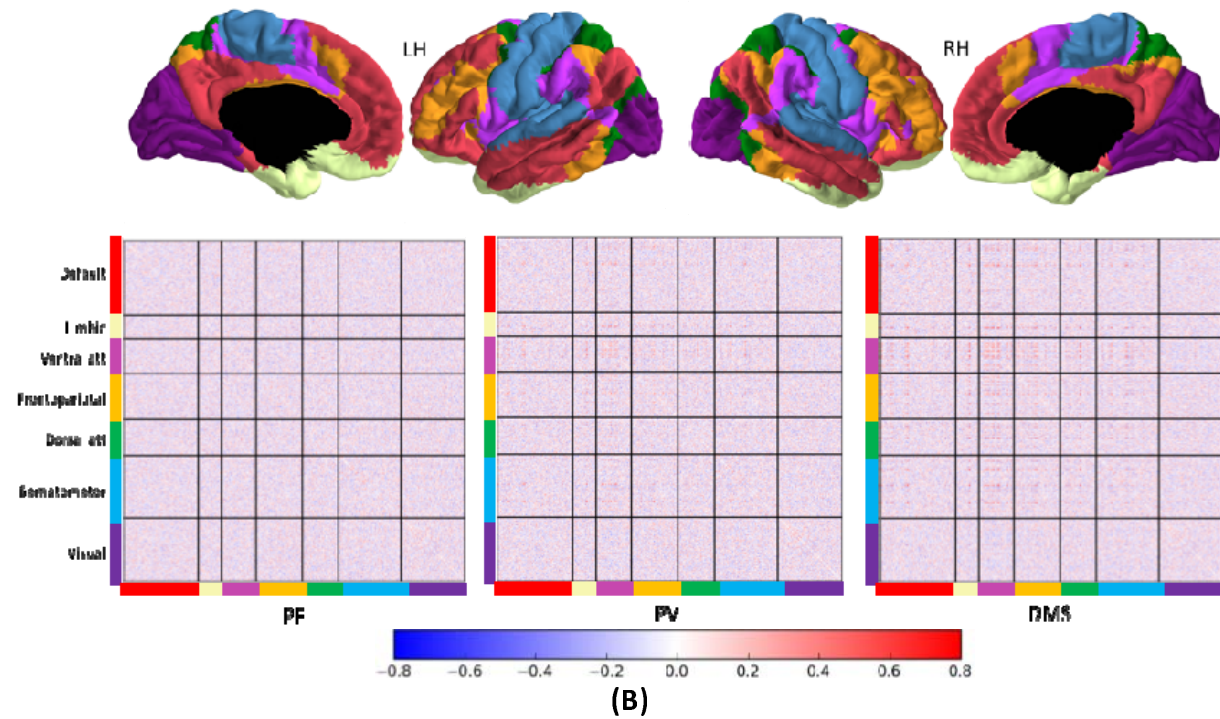

1042

1043

1044

1045

1046

1047

1048

1049

1050

**Figure 5.** Representative correlation-based functional connectivity matrices for the three conditions simulated. Subject 12 is shown above. (A) The nodes in each matrix are arranged using the standard connectome files in (Hagmann et al., 2008). (B) Nodes in the matrix have been rearranged to match Yeo et al (Yeo et al., 2011) parcellation (7 modules). Brain parcellation was displayed using Freesurfer.

1051

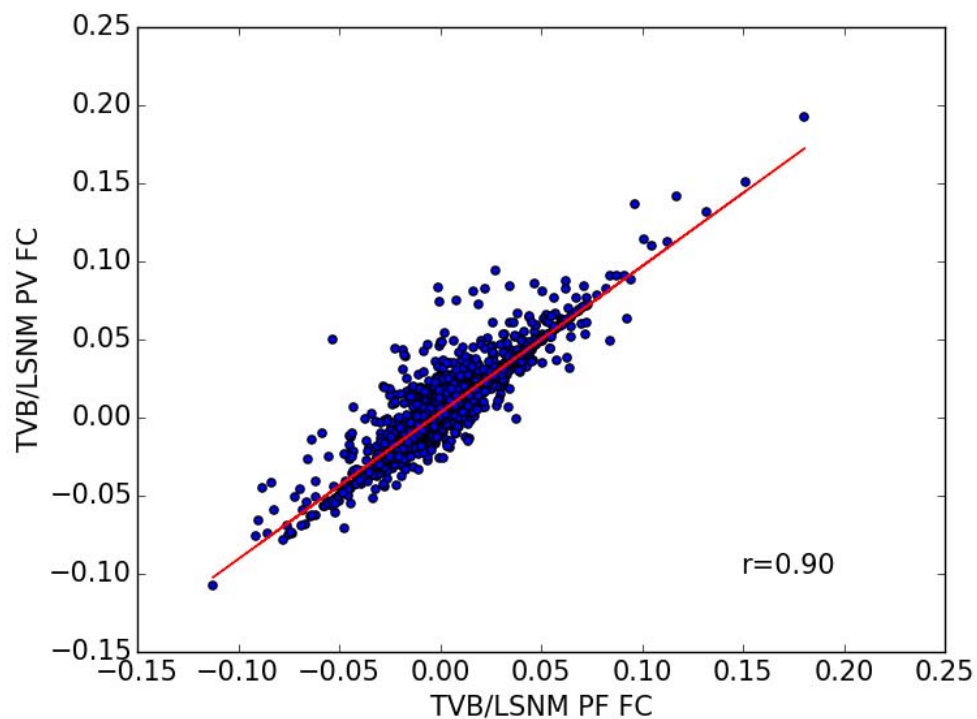

1052

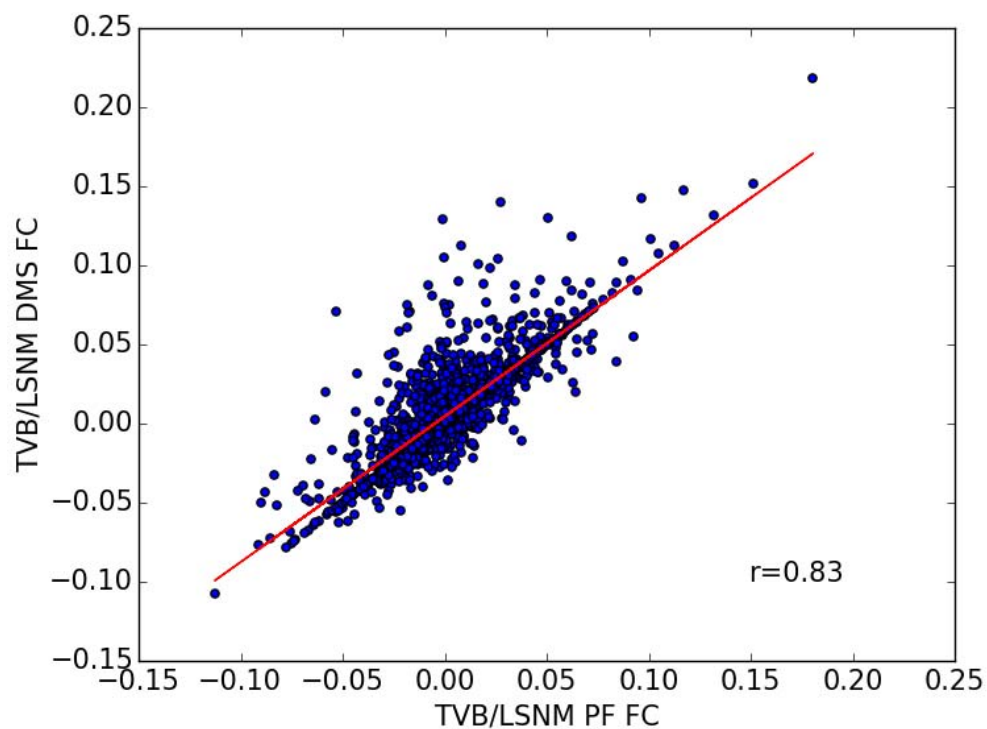

1053

1054

1055 **Figure 6.** Correlation between PF and PV and between PF and DMS weighted functional

1056 connectivity matrices.



1057

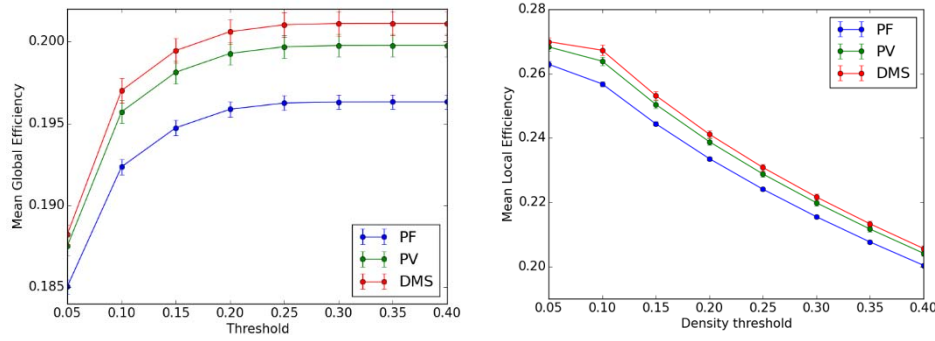

1058

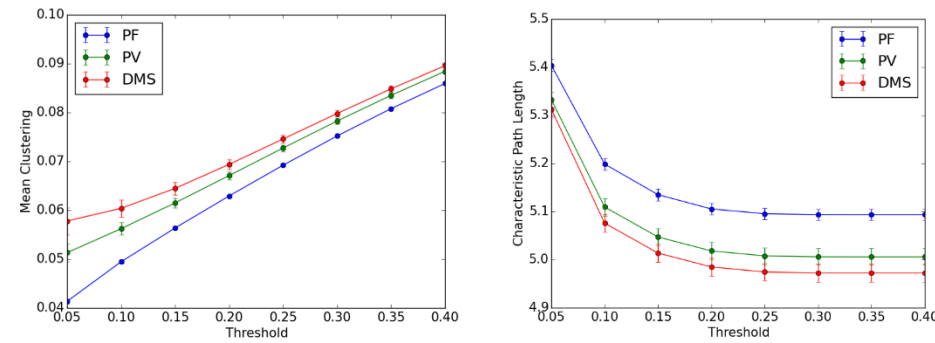

1059

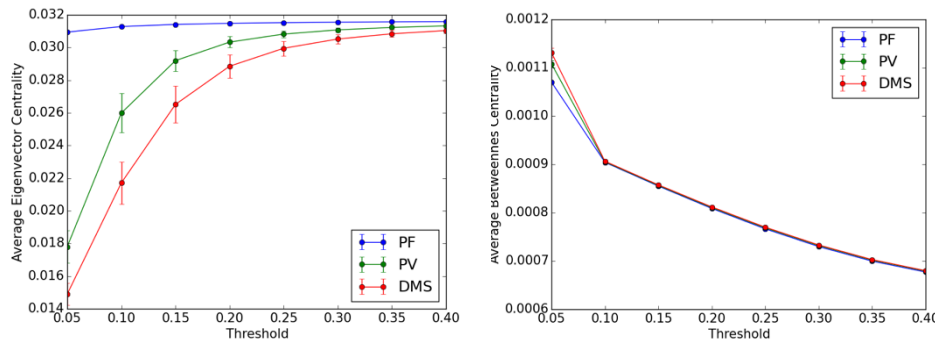

1060

1061

1062

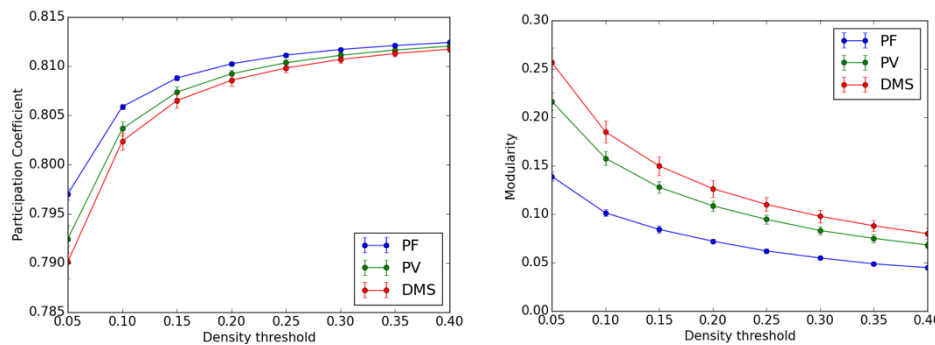

**Figure 7.** Mean graph theoretical metrics for each condition and for a range of network densities (5 to 40%). Error bars correspond to standard deviation.

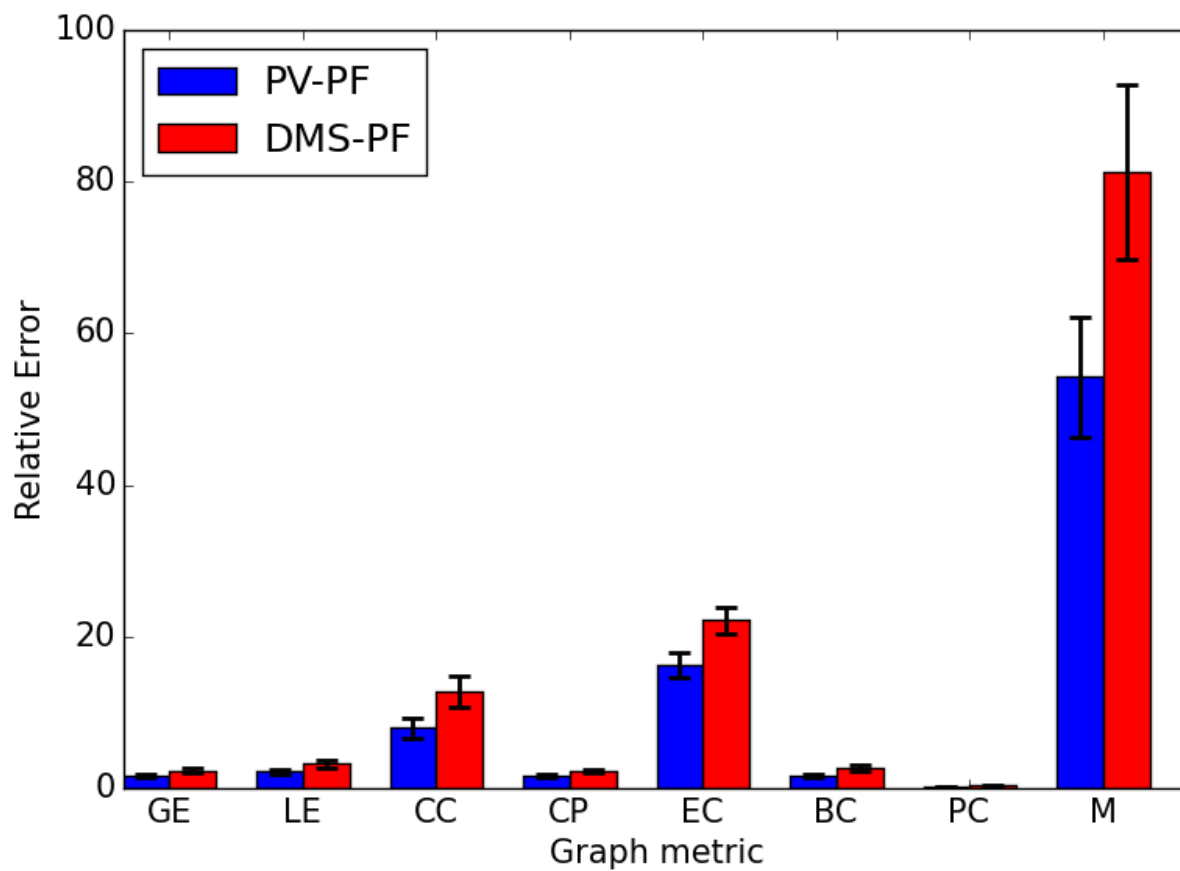

1063  
1064 **Figure 8.** Relative difference between PF and PV and between PF and DMS for each one of the  
1065 graph metrics in Figure 7. Error bars correspond to standard deviation.  
1066  
1067

1068

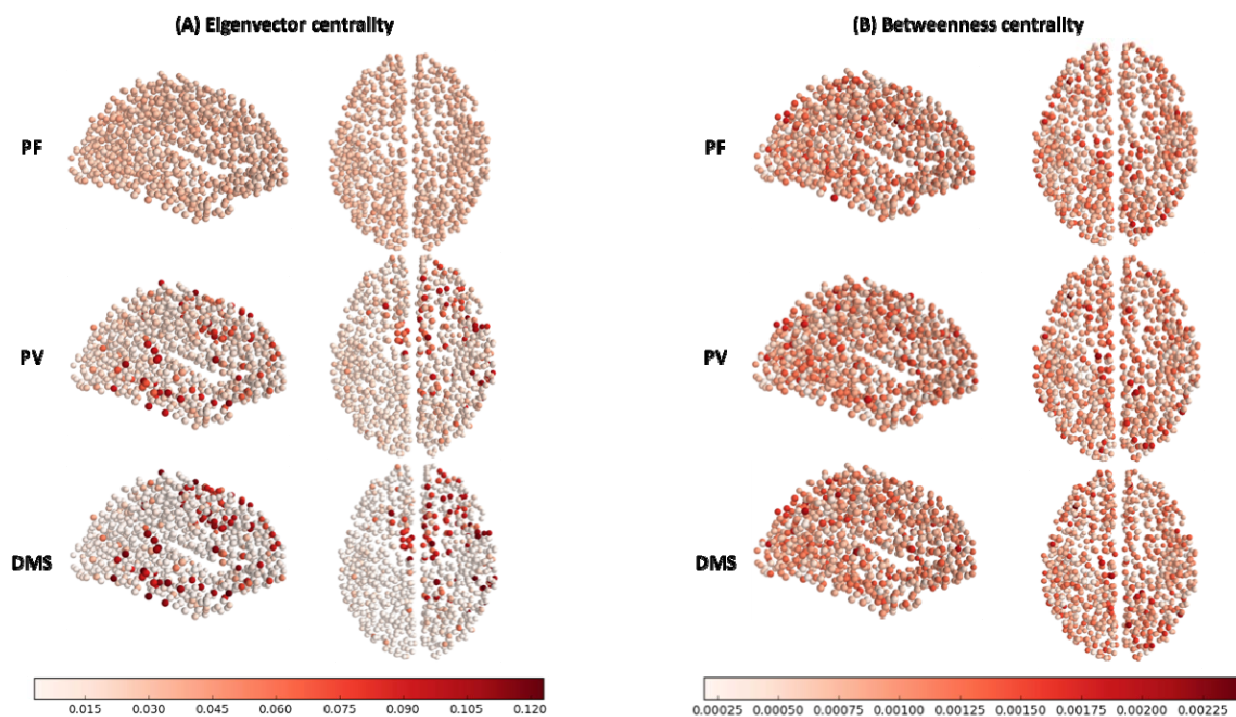

1069  
1070

1071 **Figure 9.** Eigenvector centrality (A) and betweenness centrality (B) depicted on a node-by-node  
1072 basis on sagittal (left) and axial (right) views of the brain. The density threshold used for the  
1073 depiction above was 10%.

1074

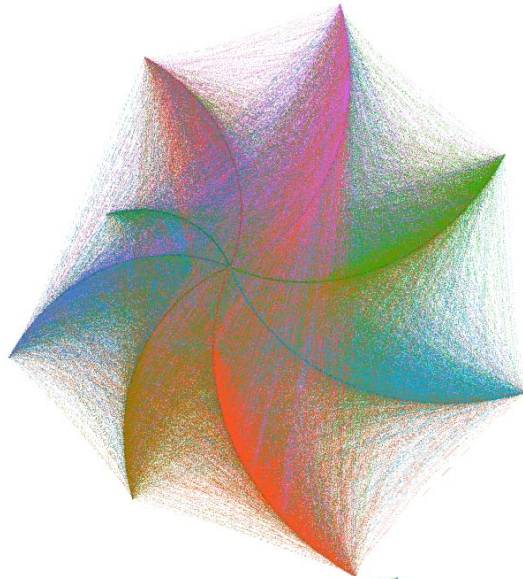

(A) PF  
[8 modules]

1075

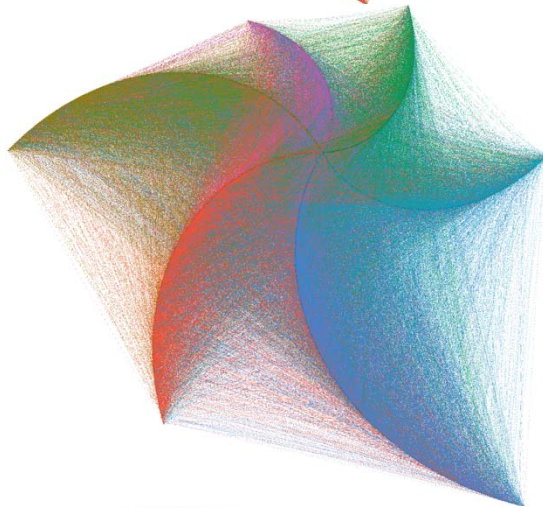

(B) PV  
[6 modules]

1076

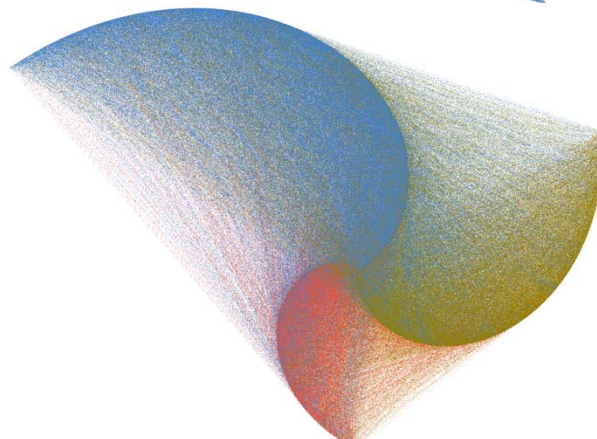

(C) DMS  
[3 modules]

1077 **Figure 10.** Modular structure of functional connectivity between non-task nodes in conditions  
1078 (A) PF, (B) PV, and (C) DMS. The graphs used unweighted, undirected functional connectivity  
1079 matrices at a density threshold of 10%. These graphs were rendered using the radial axis layout  
1080 of Gephi ([Bastian et al., 2009](#)) and the modular structures were computed using the algorithm  
1081 of ([Blondel et al., 2008](#)).

| Parameter  | Description                                              | Value |
|------------|----------------------------------------------------------|-------|
| $c_{EE}$   | Excitatory to excitatory weight                          | 12.0  |
| $c_{IE}$   | Inhibitory to excitatory weight                          | 4.0   |
| $c_{EI}$   | Excitatory to inhibitory weight                          | 13.0  |
| $c_{II}$   | Inhibitory to inhibitory weight                          | 11.0  |
| $\tau_E$   | Membrane time-constant, excitatory population            | 10.0  |
| $\tau_I$   | Membrane time-constant, inhibitory population            | 10.0  |
| $a_E$      | Slope of excitatory response function                    | 1.2   |
| $b_E$      | Position of maximum slope of excitatory sigmoid function | 2.8   |
| $c_E$      | Amplitude of excitatory response function                | 1.0   |
| $\theta_E$ | Excitatory threshold                                     | 0.0   |
| $a_I$      | Slope of inhibitory response function                    | 1.0   |
| $b_I$      | Position of maximum slope of inhibitory sigmoid function | 4.0   |
| $\theta_I$ | Inhibitory threshold                                     | 0.0   |
| $c_I$      | Amplitude of inhibitory response function                | 1.0   |
| $r_E$      | Excitatory refractory period                             | 1.0   |
| $r_I$      | Inhibitory refractor period                              | 1.0   |
| $k_E$      | Maximum value of excitatory response function            | 1.0   |
| $k_I$      | Maximum value of inhibitory response function            | 1.0   |
| $\alpha_E$ | Balance between excitatory and inhibitory                | 1.0   |
| $\alpha_I$ | Balance between excitatory and inhibitory                | 1.0   |

1082

1083 **Table S1.** Parameters used in the Wilson-Cowan equation for each connectome node within  
 1084 TVB. The parameters shown above are the default parameters within TVB and are also shown in  
 1085 Table 11(a) of ([Sanz-Leon et al., 2015](#)).

1086

1087

| Parameter                               | Value                   |
|-----------------------------------------|-------------------------|
| Number of nodes                         | 998                     |
| Global coupling strength                | 0.15                    |
| White matter transmission speed (mm/ms) | 3.0                     |
| Integrator                              | Euler stochastic (dt=5) |

1088

1089 **Table S2.** Parameters used for simulating the Hagmann et al. ([Hagmann et al., 2008](#))  
1090 connectome within the TVB resting state simulator. Please note the values of Global coupling  
1091 strength and white matter transmission speed above are different to those presented in ([Ulloa](#)  
1092 [& Horwitz, 2016](#)). In the present study we implemented a parameter search to better  
1093 reproduce empirical RS FC of ([Hagmann et al., 2008](#)). See methods sections for details.

1094

| <b>Parameter</b> | <b>E element</b> | <b>I element</b> |
|------------------|------------------|------------------|
| $K$              | 9.0              | 20.0             |
| $\phi$           | 0.3              | 0.1              |
| $N$              | $\pm 0.025$      | $\pm 0.025$      |
| $\Delta$         | 0.5              | 0.5              |
| $\delta$         | 0.5              | 0.5              |

1095

1096 **Table S3.** Parameters used in the Wilson-Cowan unit model of each LSNM submodule

1097

| Source | Destination | Fanout | Mean/SD                                                            | Percent to create | Comments                                                  |
|--------|-------------|--------|--------------------------------------------------------------------|-------------------|-----------------------------------------------------------|
| LGN    | V1          | 7x7    | 34 @ 0.003±0.003<br>2 x 5 @ 0.006 ± 0.003<br>1 x 5 @ 0.020 ± 0.002 | 100               | Highest values oriented either vertically or horizontally |
| V1h    | V4h         | 1x5    | 0.04 ± 0.01                                                        | 50                |                                                           |
| V1v    | V4v         | 5x1    | 0.04 ± 0.01                                                        | 50                |                                                           |
| V1h    | V4c         | 3x3    | 4 @ 0.0 ± 0.01<br>5 @ 0.02 ± 0.01                                  | 50                | Lowest values at the corners                              |
| V1v    | V4c         | 3x3    | 4 @ 0.0 ± 0.01<br>5 @ 0.02 ± 0.01                                  | 50                | Lowest values at the corners                              |
| V4     | IT          | 5x5    | 0.01 ± 0.01                                                        | 50                | Learned                                                   |
| IT     | FS          | 1x1    | 0.2 ± 0.02                                                         | 100               |                                                           |
| D2     | V4          | 5x5    | 0.0014 ± 0.0007                                                    | 100               |                                                           |
| D1     | IT          | 1x1    | 0.03 ± 0.001                                                       | 100               | Inhibitory                                                |
| D2     | IT          | 1x1    | 0.01 ± 0.002                                                       | 100               |                                                           |
| IT     | V4          | 4x4    | 0.00125 ± 0.0006                                                   | 100               |                                                           |

1098

1099 **Table S4.** Connection patterns among submodules of LSNM model

1100



| <b>Source</b> | <b>Destination</b> | <b>Element</b> | <b>Weight</b> |
|---------------|--------------------|----------------|---------------|
| FS            | D2                 | E              | 0.07          |
| FS            | FR                 | E              | 0.05          |
| D1            | FR                 | E              | 0.06          |
| D1            | D2                 | E              | 0.105         |
| D2            | D1                 | E              | 0.10          |
| D1            | FS                 | I              | 0.02          |
| FS            | D1                 | I              | 0.05          |
| FR            | D1                 | I              | 0.03          |
| FR            | D2                 | I              | 0.065         |

1101

1102 **Table S5.** Connection weights among submodules in the prefrontal cortex region of LSMN

1103

| Parameter     | Description                                             | Value | Reference                                                                    |
|---------------|---------------------------------------------------------|-------|------------------------------------------------------------------------------|
| $\tau_s$      | Rate constant of vasodilatory signal decay in seconds   | 1.54  | ( <a href="#">Heinzle, Koopmans, den Ouden, Raman, &amp; Stephan, 2016</a> ) |
| $\tau_f$      | Time of flow-dependent elimination in seconds           | 2.44  | ( <a href="#">Heinzle et al., 2016</a> )                                     |
| $\alpha$      | Grubb's vessel stiffness exponent                       | 0.32  | ( <a href="#">Heinzle et al., 2016</a> )                                     |
| $\tau_0$      | Hemodynamic transit time in seconds                     | 2.0   | ( <a href="#">Havlicek et al., 2015</a> )                                    |
| $\epsilon$    | Efficacy of synaptic activity to induce signal          | 0.1   | ( <a href="#">Friston et al., 2000</a> )                                     |
| $r_0$         | Slope of intravascular relaxation rate in Hertz         | 108.0 | ( <a href="#">Havlicek et al., 2015</a> )                                    |
| $\vartheta_0$ | Frequency offset at outer surface of magnetized vessels | 80.6  | ( <a href="#">Obata et al., 2004</a> )                                       |
| $\epsilon$    | Ratio of intra- and extravascular BOLD signal at rest   | 0.47  | ( <a href="#">Heinzle et al., 2016</a> )                                     |
| $V_0$         | Resting blood volume fraction                           | 0.02  | ( <a href="#">Obata et al., 2004</a> )                                       |
| $E_0$         | Resting oxygen extraction fraction                      | 0.34  | ( <a href="#">Heinzle et al., 2016</a> )                                     |
| $TE$          | Echo time                                               | 0.03  | ( <a href="#">Heinzle et al., 2016</a> )                                     |

1104

1105 **Table S6.** Parameters used for the Balloon model of hemodynamic response used in our

1106 simulations. Values are based on a 3T MRI magnet.
